# Supplementary material for: Stability and transferability of machine learning force fields for molecular dynamics applications
Source: Royal Society of Chemistry journal article supplement (doi:10.1039/d4dd00140k), 2024-01-01
Supplement: d4dd00140k1.pdf [file d4dd00140k1.pdf]

## Supporting information

### Stability and Transferability of Machine Learning Force Field for Molecular Dynamics Applications

*Salatan Duangdangchote, Dwight S. Seferos, and Oleksandr Voznyy\**

Prof. O. Voznyy, S. Duangdangchote

Department of Physical and Environmental Sciences, University of Toronto (Scarborough), 1065  
Military Trail, M1C 1A4 Toronto, Ontario, Canada

Prof. D. S. Seferos

Department of Chemistry, University of Toronto, Toronto, ON M5S 3H6, Canada

**Table S1** Comparison of MLFF-MD computation results with AIMD reference data of  $\text{Li}_{10}\text{GeP}_2\text{S}_{12}$  for energy, forces, and radial distribution functions (RDF) across various temperatures

| Model        | MAE    | Temperature |        |         |        |         | Average |
|--------------|--------|-------------|--------|---------|--------|---------|---------|
|              |        | 800 K       | 900 K  | 1000 K  | 1100 K | 1200K   |         |
| CGCNN        | Energy | 0.105       | 0.106  | 0.116   | 0.136  | 0.166   | 0.126   |
|              | Forces | 0.051       | 0.056  | 0.063   | 0.167  | 0.072   | 0.082   |
|              | RDF    | 0.007       | 0.008  | 0.087   | 0.282  | 0.601   | 0.197   |
| SchNet       | Energy | 0.079       | 0.055  | 0.616   | 0.084  | 0.120   | 0.191   |
|              | Forces | 0.024       | 0.028  | 0.031   | 0.033  | 0.037   | 0.031   |
|              | RDF    | 0.007       | 0.004  | 0.003   | 0.003  | 0.009   | 0.005   |
| DimeNet      | Energy | 0.027       | 0.033  | 0.038   | 0.047  | 0.053   | 0.030   |
|              | Forces | 0.011       | 0.013  | 0.014   | 0.015  | 0.017   | 0.014   |
|              | RDF    | 0.003       | 0.004  | 0.003   | 0.002  | 0.003   | 0.003   |
| DimeNet++    | Energy | 0.022       | 0.025  | 0.029   | 0.034  | 0.038   | 0.030   |
|              | Forces | 0.008       | 0.009  | 0.010   | 0.011  | 0.012   | 0.010   |
|              | RDF    | 0.003       | 0.006  | 0.004   | 0.002  | 0.003   | 0.004   |
| GNS-TAT      | Energy | 0.074       | 0.046  | 0.041   | 0.056  | 0.083   | 0.060   |
|              | Forces | 0.011       | 0.013  | 0.014   | 0.015  | 0.017   | 0.014   |
|              | RDF    | 0.037       | 0.003  | 0.005   | 0.154  | 0.078   | 0.055   |
| DeeperGATGNN | Energy | 0.095       | 0.091  | 0.103   | 0.133  | 0.166   | 0.118   |
|              | Forces | 0.042       | 0.047  | 0.051   | 0.055  | 0.059   | 0.051   |
|              | RDF    | 140.703     | 34.883 | 112.352 | 35.528 | 101.464 | 84.986  |
| SCN          | Energy | 0.028       | 0.033  | 0.034   | 0.038  | 0.042   | 0.035   |
|              | Forces | 0.006       | 0.007  | 0.007   | 0.008  | 0.009   | 0.007   |
|              | RDF    | 0.003       | 0.006  | 0.003   | 0.003  | 0.003   | 0.004   |
| eSCN         | Energy | 0.061       | 0.052  | 0.046   | 0.044  | 0.041   | 0.049   |
|              | Forces | 0.007       | 0.008  | 0.009   | 0.009  | 0.010   | 0.009   |
|              | RDF    | 0.004       | 0.006  | 0.004   | 0.004  | 0.003   | 0.004   |
| ForceNet     | Energy | N/A         | N/A    | N/A     | N/A    | N/A     | –       |
|              | Forces | 0.020       | 0.022  | 0.024   | 0.026  | 0.287   | 0.076   |
|              | RDF    | 0.274       | 0.272  | 0.302   | 0.279  | 0.282   | 0.282   |
| Equiformer   | Energy | 0.105       | 0.096  | 0.094   | 0.104  | 0.019   | 0.084   |
|              | Forces | 0.012       | 0.013  | 0.014   | 0.015  | 0.016   | 0.014   |
|              | RDF    | 0.005       | 0.006  | 0.005   | 0.003  | 0.003   | 0.004   |
| LeftNet      | Energy | 0.039       | 0.045  | 0.047   | 0.052  | 0.058   | 0.048   |
|              | Forces | 0.009       | 0.011  | 0.013   | 0.014  | 0.015   | 0.012   |
|              | RDF    | 0.003       | 0.005  | 0.004   | 0.003  | 0.003   | 0.004   |

**Table S2** Comparison of MLFF-MD computation results with AIMD reference data of  $\text{Li}_3\text{PS}_4$  for energy, forces, and radial distribution functions (RDF) across various temperatures

| Model        | MAE    | Temperature |        |         |        |         | Average |
|--------------|--------|-------------|--------|---------|--------|---------|---------|
|              |        | 800 K       | 900 K  | 1000 K  | 1100 K | 1200K   |         |
| CGCNN        | Energy | 0.105       | 0.106  | 0.116   | 0.136  | 0.166   | 0.126   |
|              | Forces | 0.051       | 0.056  | 0.063   | 0.167  | 0.072   | 0.082   |
|              | RDF    | 0.007       | 0.008  | 0.087   | 0.282  | 0.601   | 0.197   |
| SchNet       | Energy | 0.079       | 0.055  | 0.616   | 0.084  | 0.120   | 0.191   |
|              | Forces | 0.024       | 0.028  | 0.031   | 0.033  | 0.037   | 0.031   |
|              | RDF    | 0.007       | 0.004  | 0.003   | 0.003  | 0.009   | 0.005   |
| DimeNet      | Energy | 0.027       | 0.033  | 0.038   | 0.047  | 0.053   | 0.030   |
|              | Forces | 0.011       | 0.013  | 0.014   | 0.015  | 0.017   | 0.014   |
|              | RDF    | 0.003       | 0.004  | 0.003   | 0.002  | 0.003   | 0.003   |
| DimeNet++    | Energy | 0.022       | 0.025  | 0.029   | 0.034  | 0.038   | 0.030   |
|              | Forces | 0.008       | 0.009  | 0.010   | 0.011  | 0.012   | 0.010   |
|              | RDF    | 0.003       | 0.006  | 0.004   | 0.002  | 0.003   | 0.004   |
| GNS-TAT      | Energy | 0.074       | 0.046  | 0.041   | 0.056  | 0.083   | 0.060   |
|              | Forces | 0.011       | 0.013  | 0.014   | 0.015  | 0.017   | 0.014   |
|              | RDF    | 0.037       | 0.003  | 0.005   | 0.154  | 0.078   | 0.055   |
| DeeperGATGNN | Energy | 0.095       | 0.091  | 0.103   | 0.133  | 0.166   | 0.118   |
|              | Forces | 0.042       | 0.047  | 0.051   | 0.055  | 0.059   | 0.051   |
|              | RDF    | 140.703     | 34.883 | 112.352 | 35.528 | 101.464 | 84.986  |
| SCN          | Energy | 0.028       | 0.033  | 0.034   | 0.038  | 0.042   | 0.035   |
|              | Forces | 0.006       | 0.007  | 0.007   | 0.008  | 0.009   | 0.007   |
|              | RDF    | 0.003       | 0.006  | 0.003   | 0.003  | 0.003   | 0.004   |
| eSCN         | Energy | 0.061       | 0.052  | 0.046   | 0.044  | 0.041   | 0.049   |
|              | Forces | 0.007       | 0.008  | 0.009   | 0.009  | 0.010   | 0.009   |
|              | RDF    | 0.004       | 0.006  | 0.004   | 0.004  | 0.003   | 0.004   |
| ForceNet     | Energy | N/A         | N/A    | N/A     | N/A    | N/A     | –       |
|              | Forces | 0.135       | 0.139  | 0.146   | 0.148  | 0.152   | 0.144   |
|              | RDF    | 0.370       | 0.479  | 0.410   | 0.431  | 0.377   | 0.413   |
| Equiformer   | Energy | 74.168      | 74.154 | 74.153  | 74.179 | 74.145  | 74.160  |
|              | Forces | 0.096       | 0.100  | 0.086   | 0.099  | 0.087   | 0.094   |
|              | RDF    | 1.294       | 0.300  | 0.451   | 0.380  | 0.022   | 0.489   |
| LeftNet      | Energy | 73.324      | 73.333 | 73.173  | 73.367 | 73.341  | 73.308  |
|              | Forces | 0.090       | 0.093  | 0.081   | 0.093  | 0.083   | 0.088   |
|              | RDF    | 0.080       | 0.050  | 0.054   | 0.042  | 0.038   | 0.053   |

**Table S3** Comparison of MLFF-MD computation results of GNN model with AIMD reference data of  $\text{Li}_4\text{GeS}_4$  for energy, forces, and radial distribution functions (RDF) across various temperatures

| Model        | MAE    | Temperature |        |        |        |        | Average |
|--------------|--------|-------------|--------|--------|--------|--------|---------|
|              |        | 800 K       | 900 K  | 1000 K | 1100 K | 1200K  |         |
| CGCNN        | Energy | 45.356      | 45.342 | 45.706 | 45.686 | 45.801 | 45.578  |
|              | Forces | 0.515       | 0.524  | 0.544  | 0.554  | 0.566  | 0.541   |
|              | RDF    | 1.077       | 1.274  | 1.369  | 1.607  | 1.637  | 1.393   |
| SchNet       | Energy | 56.285      | 56.362 | 56.385 | 56.455 | 56.548 | 56.407  |
|              | Forces | 0.175       | 0.179  | 0.194  | 0.198  | 0.213  | 0.192   |
|              | RDF    | N/A         | N/A    | N/A    | N/A    | N/A    | –       |
| DimeNet      | Energy | 61.553      | 61.552 | 61.493 | 61.517 | 61.426 | 61.508  |
|              | Forces | 0.082       | 0.084  | 0.086  | 0.089  | 0.091  | 0.086   |
|              | RDF    | 0.018       | 0.018  | 0.015  | 0.012  | 0.013  | 0.015   |
| DimeNet++    | Energy | 61.977      | 61.976 | 61.938 | 61.966 | 61.896 | 61.951  |
|              | Forces | 0.082       | 0.084  | 0.086  | 0.089  | 0.092  | 0.087   |
|              | RDF    | 0.018       | 0.017  | 0.013  | 0.009  | 0.012  | 0.014   |
| GNS-TAT      | Energy | 60.916      | 60.721 | 60.382 | 60.209 | 59.844 | 60.414  |
|              | Forces | 0.219       | 0.228  | 0.236  | 0.245  | 0.252  | 0.236   |
|              | RDF    | 0.037       | 0.035  | 0.050  | 0.041  | 0.049  | 0.042   |
| DeeperGATGNN | Energy | 56.034      | 55.914 | 55.629 | 55.506 | 55.104 | 55.637  |
|              | Forces | 0.285       | 0.304  | 0.334  | 0.349  | 0.383  | 0.331   |
|              | RDF    | 0.111       | 0.108  | 0.087  | 0.097  | 0.483  | 0.177   |
| SCN          | Energy | 62.114      | 62.125 | 62.137 | 62.186 | 62.146 | 62.142  |
|              | Forces | 0.080       | 0.082  | 0.083  | 0.085  | 0.087  | 0.083   |
|              | RDF    | 0.032       | 0.025  | 0.031  | 0.017  | 0.015  | 0.024   |
| eSCN         | Energy | 61.896      | 61.907 | 61.909 | 61.954 | 61.919 | 61.917  |
|              | Forces | 0.080       | 0.082  | 0.083  | 0.085  | 0.087  | 0.083   |
|              | RDF    | 0.046       | 0.041  | 0.051  | 0.037  | 0.029  | 0.041   |
| ForceNet     | Energy | N/A         | N/A    | N/A    | N/A    | N/A    | –       |
|              | Forces | 0.094       | 0.098  | 0.105  | 0.109  | 0.117  | 0.105   |
|              | RDF    | 0.382       | 0.398  | 0.345  | 0.267  | 0.342  | 0.347   |
| Equiformer   | Energy | 62.142      | 62.174 | 62.167 | 62.230 | 62.191 | 62.181  |
|              | Forces | 0.082       | 0.084  | 0.087  | 0.089  | 0.091  | 0.087   |
|              | RDF    | 0.420       | 0.049  | 0.291  | 0.076  | 0.164  | 0.200   |
| LeftNet      | Energy | 61.744      | 61.746 | 61.796 | 61.837 | 61.871 | 61.799  |
|              | Forces | 0.077       | 0.079  | 0.081  | 0.083  | 0.086  | 0.081   |
|              | RDF    | 0.017       | 0.015  | 0.015  | 0.008  | 0.010  | 0.013   |

**Table S4** Predicting the negative logarithm of the diffusivity via molecular dynamics of  $\text{Li}_{10}\text{GeP}_2\text{S}_{12}$  across different temperatures using machine learning force field against AIMD reference data

| Model        | Temperatures |       |        |        |        | $R^2$ | MAE   |
|--------------|--------------|-------|--------|--------|--------|-------|-------|
|              | 800 K        | 900 K | 1000 K | 1100 K | 1200 K |       |       |
| AIMD         | 2.731        | 4.114 | 4.753  | 5.610  | 8.013  | 0.942 |       |
| CGCNN        | 1.843        | 1.555 | 3.065  | 4.275  | 9.153  | 0.786 | 1.782 |
| SchNet       | 2.099        | 2.170 | 3.377  | 4.336  | 4.958  | 0.955 | 1.394 |
| DimeNet      | 1.616        | 1.800 | 2.487  | 4.053  | 5.400  | 0.921 | 0.851 |
| DimeNet++    | 1.796        | 1.788 | 3.337  | 4.336  | 4.958  | 0.955 | 1.394 |
| GNS-TAT      | 1.692        | 2.960 | 2.888  | 3.473  | 6.128  | 0.814 | 1.186 |
| DeeperGATGNN | 0.780        | 1.070 | 0.875  | 2.556  | 0.559  | 0.043 | 3.436 |
| SCN          | 1.944        | 2.356 | 2.586  | 4.487  | 6.170  | 0.884 | 1.253 |
| eSCN         | 1.463        | 1.845 | 2.860  | 1.776  | 2.751  | 0.400 | 1.793 |

|            |       |       |       |       |       |       |       |
|------------|-------|-------|-------|-------|-------|-------|-------|
| ForceNet   | 0.000 | 0.000 | 0.000 | 0.000 | 0.000 | –     | –     |
| Equiformer | 2.023 | 2.214 | 2.748 | 4.208 | 5.720 | 0.903 | 1.402 |
| LeftNet    | 1.592 | 1.439 | 1.469 | 1.505 | 4.270 | 0.478 | 1.619 |

**Table S5** Predicting the negative logarithm of the diffusivity via molecular dynamics of  $\text{Li}_3\text{PS}_4$  across different temperatures using machine learning force field against AIMD reference data

| Model        | Temperatures |       |        |        |        | $R^2$ | MAE   |
|--------------|--------------|-------|--------|--------|--------|-------|-------|
|              | 800 K        | 900 K | 1000 K | 1100 K | 1200 K |       |       |
| AIMD         | 1.561        | 3.385 | 6.938  | 6.795  | 11.663 | 0.928 |       |
| CGCNN        | 0.261        | 0.338 | 1.161  | 5.292  | 8.492  | 0.860 | 4.462 |
| SchNet       | N/A          | N/A   | N/A    | N/A    | N/A    | –     | –     |
| DimeNet      | 1.813        | 4.263 | 6.264  | 7.384  | 11.437 | 0.966 | 0.178 |
| DimeNet++    | 2.268        | 3.864 | 5.928  | 8.810  | 12.456 | 0.972 | 0.374 |
| GNS-TAT      | 0.032        | 0.172 | 0.920  | 1.092  | 1.574  | 0.958 | 5.607 |
| DeeperGATGNN | 1.349        | 1.253 | 2.019  | 1.561  | 2.359  | 0.617 | 4.556 |
| SCN          | 2.570        | 3.347 | 4.715  | 5.777  | 9.823  | 0.889 | 0.328 |
| eSCN         | 0.156        | 0.643 | 1.397  | 4.492  | 4.108  | 0.856 | 4.336 |
| ForceNet     | 0.000        | 0.000 | 0.000  | 0.000  | 0.000  | –     | –     |

|            |       |       |       |       |       |       |       |
|------------|-------|-------|-------|-------|-------|-------|-------|
| Equiformer | 2.023 | 2.214 | 2.748 | 4.208 | 5.720 | 0.903 | 1.402 |
| LeftNet    | 1.592 | 1.439 | 1.469 | 1.505 | 4.270 | 0.478 | 1.619 |



**Table S6** Predicting the negative logarithm of the diffusivity via molecular dynamics of  $\text{Li}_4\text{GeS}_4$  across different temperatures using machine learning force field against AIMD reference data

| Model        | Temperatures |       |        |        |        | $R^2$ | MAE   |
|--------------|--------------|-------|--------|--------|--------|-------|-------|
|              | 800 K        | 900 K | 1000 K | 1100 K | 1200 K |       |       |
| AIMD         | 0.005        | 0.229 | 1.774  | 2.805  | 5.305  | 0.927 |       |
| CGCNN        | 2.654        | 2.850 | 4.734  | 3.644  | 4.387  | 0.542 | 2.783 |
| SchNet       | N/A          | N/A   | N/A    | N/A    | N/A    | –     | –     |
| DimeNet      | 0.045        | 0.524 | 0.823  | 2.721  | 5.360  | 0.863 | 1.911 |
| DimeNet++    | 0.119        | 0.317 | 2.450  | 2.688  | 5.341  | 0.910 | 1.911 |
| GNS-TAT      | 0.000        | 0.000 | 0.000  | 0.003  | 0.234  | 0.510 | 2.398 |
| DeeperGATGNN | 0.082        | 0.174 | 0.254  | 0.554  | 0.488  | 0.862 | 2.302 |
| SCN          | 0.000        | 0.000 | 0.395  | 1.235  | 3.099  | 0.811 | 2.150 |
| eSCN         | 0.000        | 0.000 | 0.000  | 0.556  | 1.991  | 0.692 | 2.257 |
| ForceNet     | 0.000        | 0.000 | 0.000  | 0.000  | 0.000  | –     | –     |

|            |       |       |       |       |       |       |       |
|------------|-------|-------|-------|-------|-------|-------|-------|
| Equiformer | 0.381 | 0.624 | 2.895 | 3.352 | 4.919 | 0.947 | 1.788 |
| LeftNet    | 0.376 | 0.285 | 1.821 | 2.850 | 4.350 | 0.934 | 1.788 |

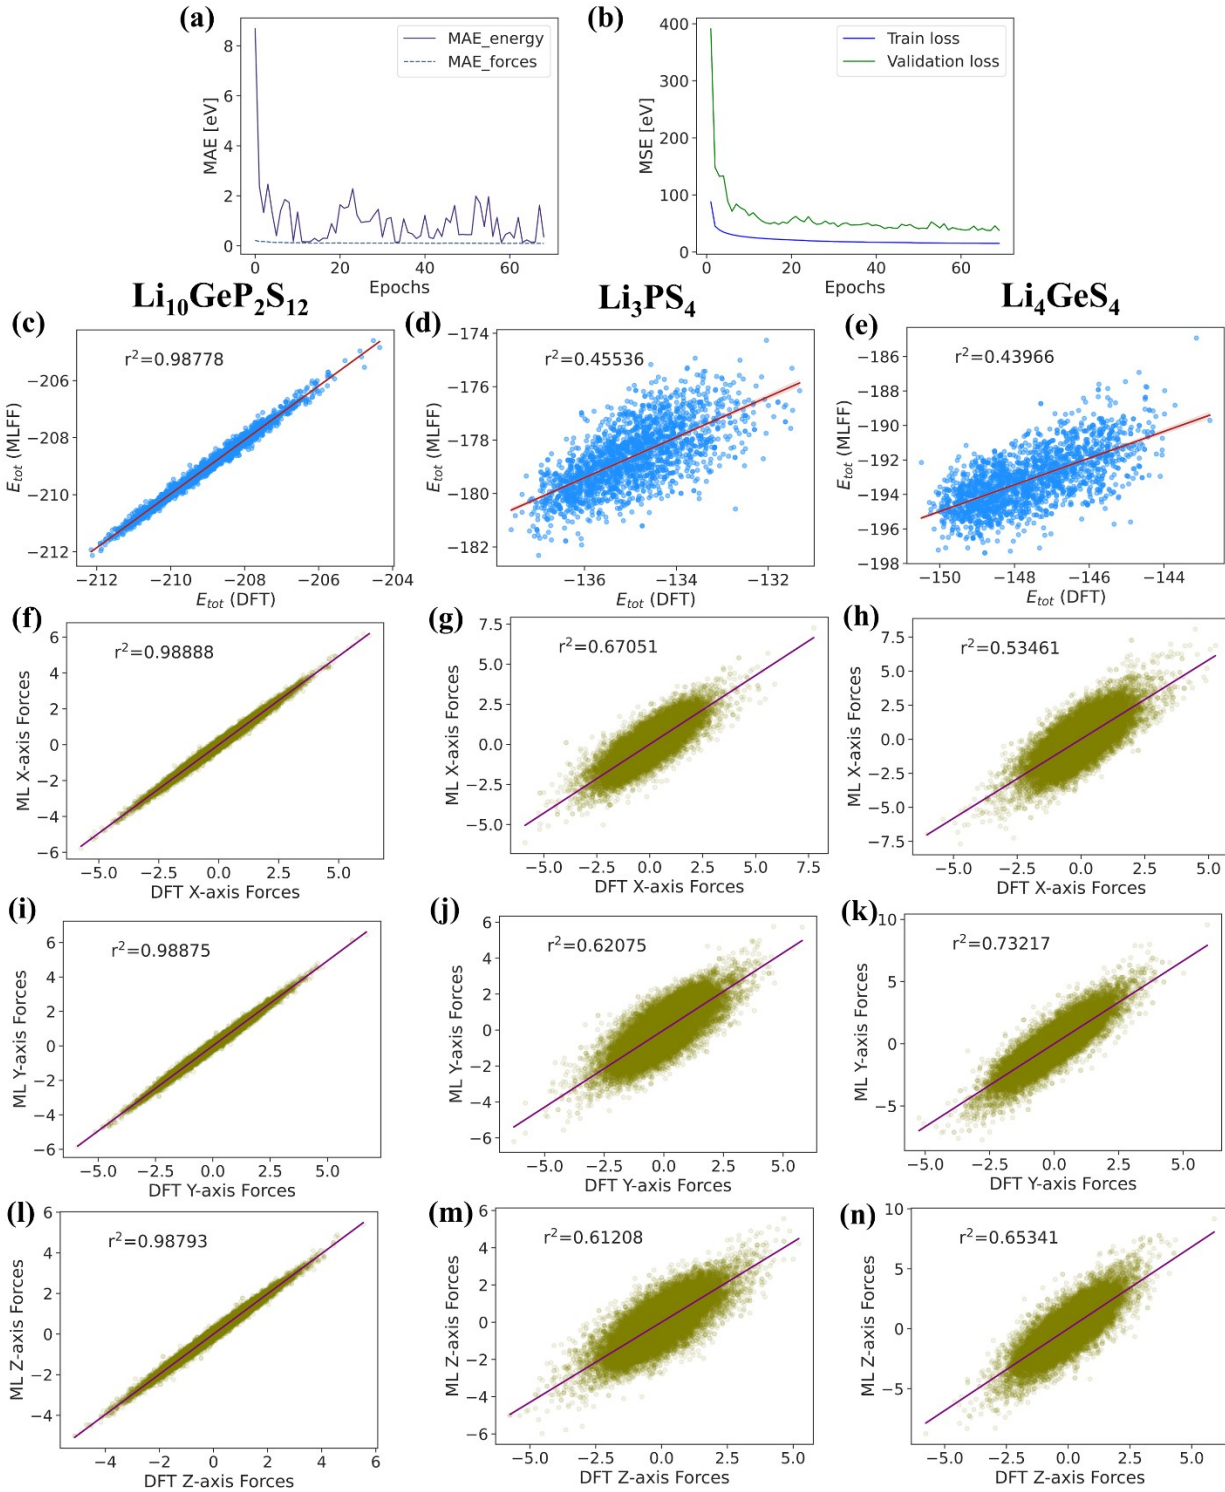

**Figure S1** Training metrics (a) and losses (b) along with their direct energy and forces predictions (c–n) of CGCNN model against AIMD reference data for different materials

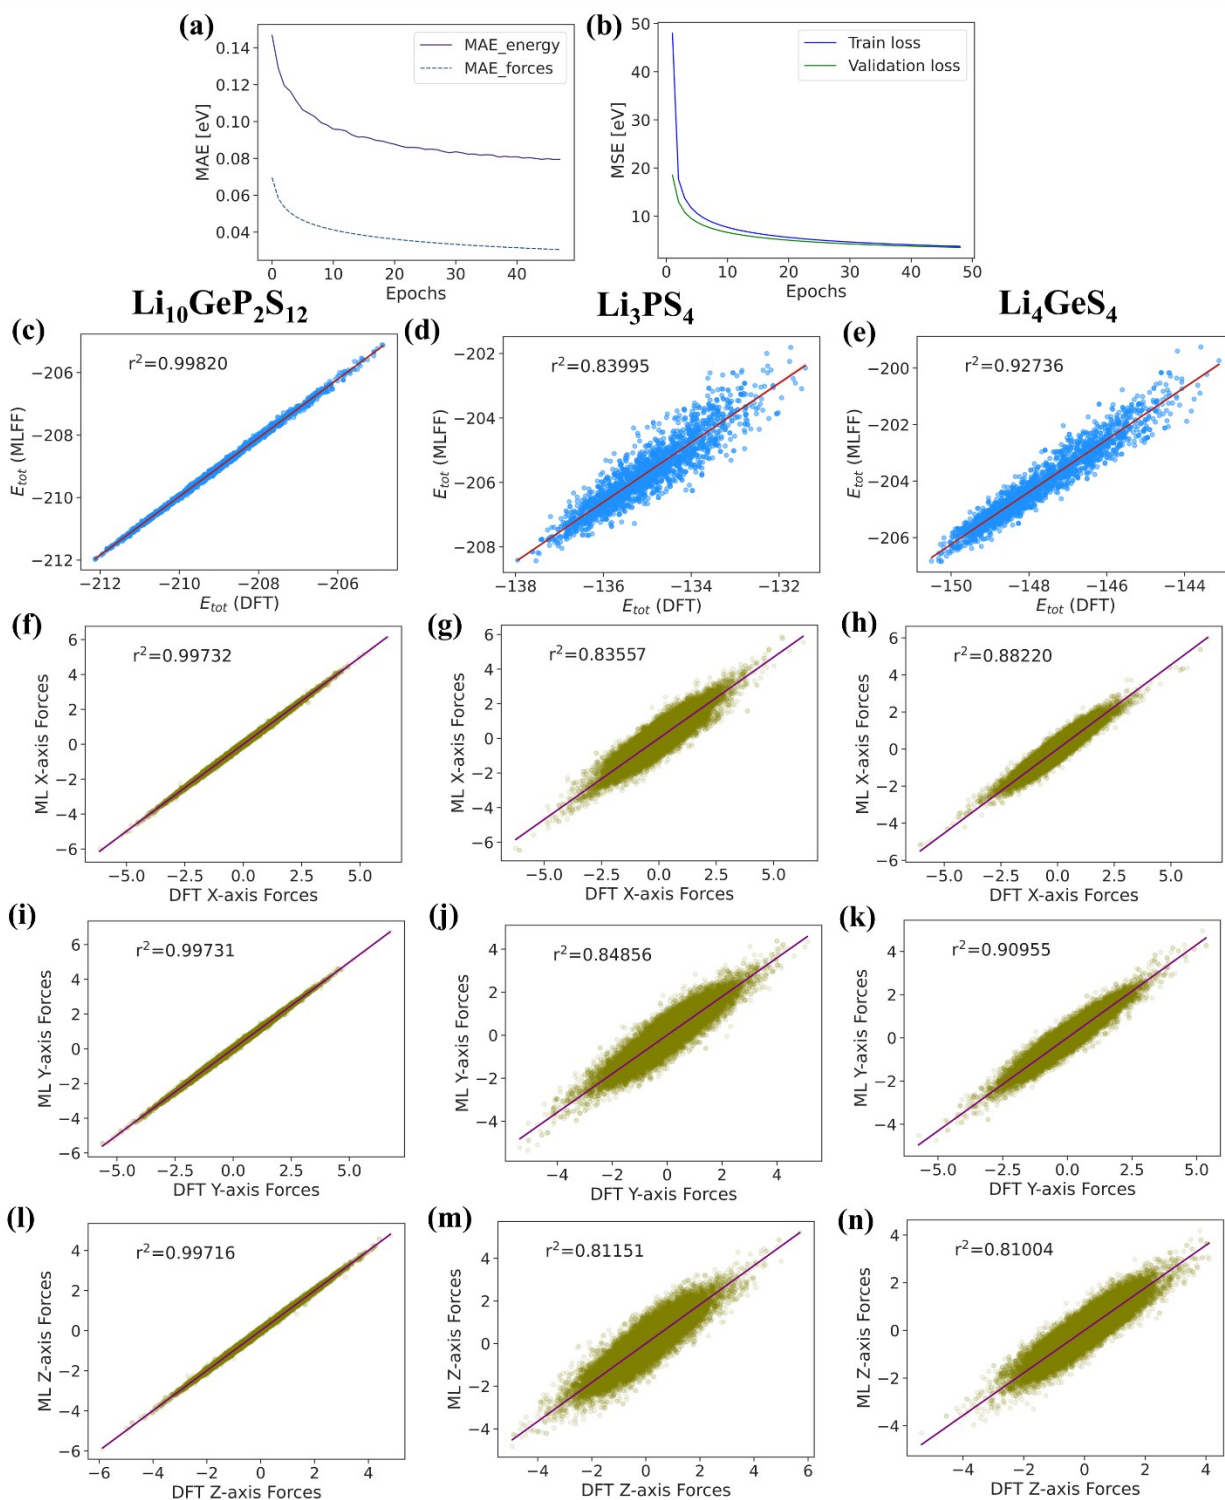

**Figure** Training metrics (a) and losses (b) along with their direct energy and forces predictions (c–n) of SchNet model against AIMD reference data for different materials

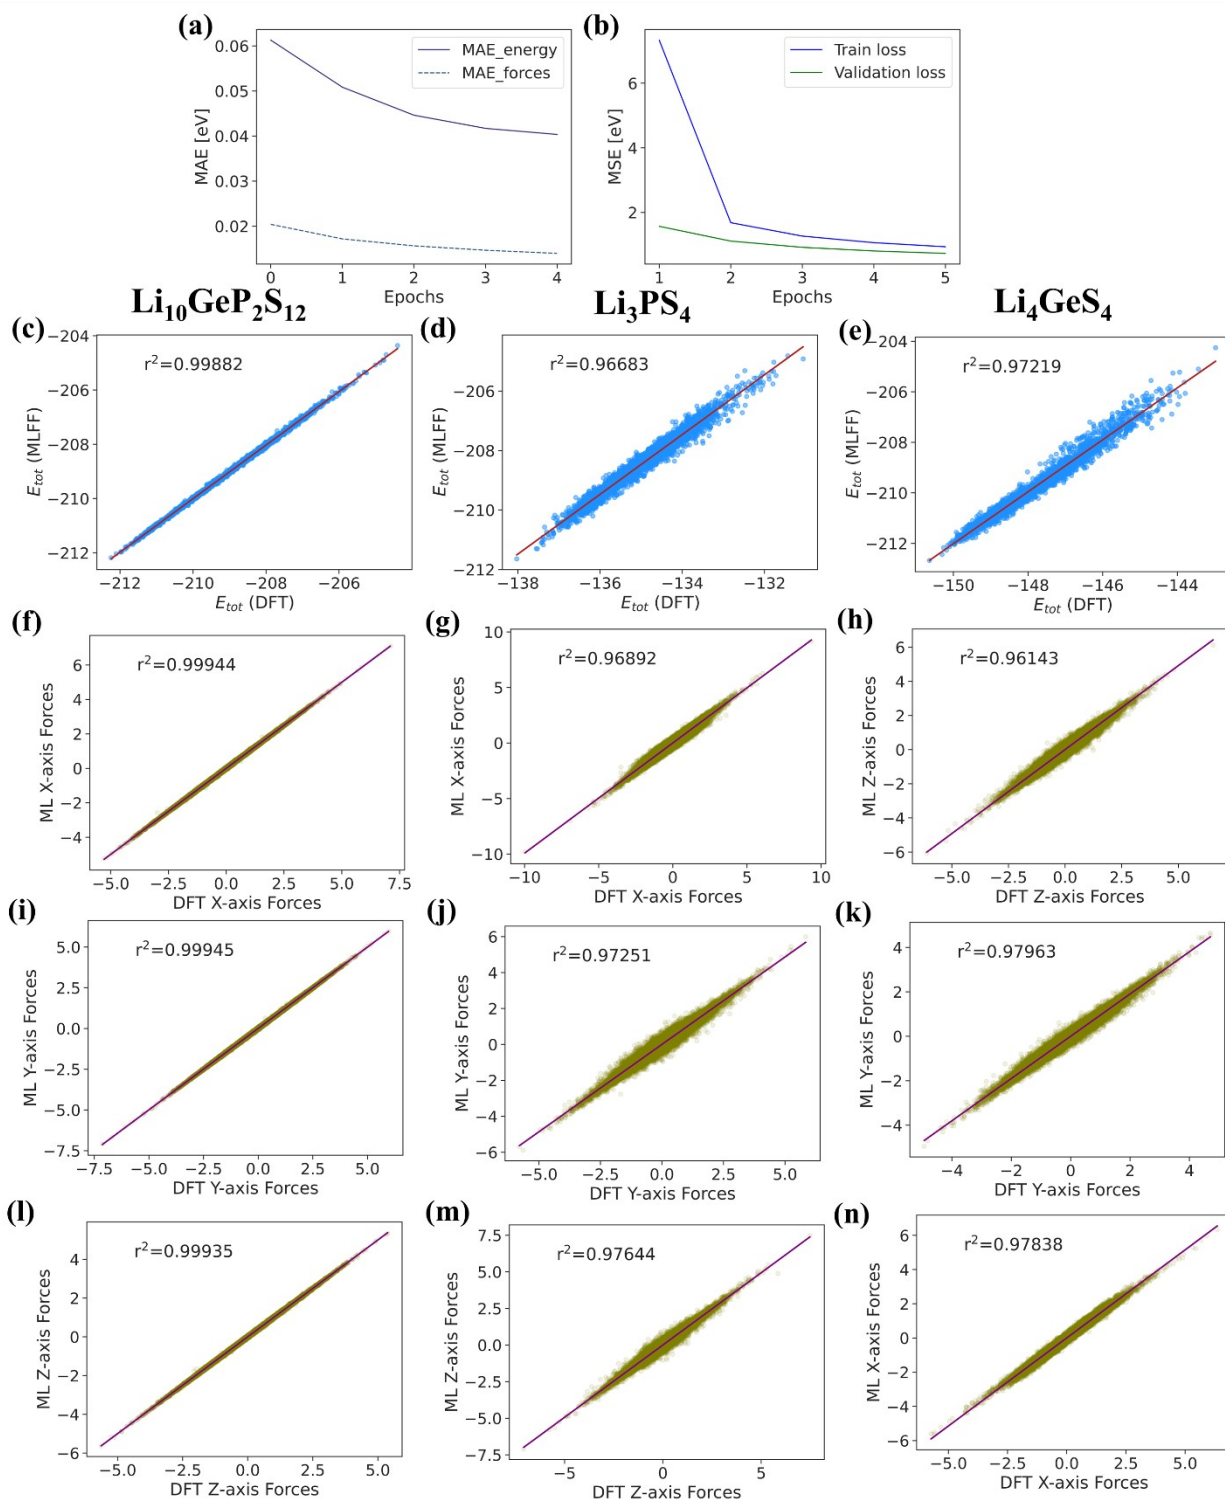

**Figure S3** Training metrics (a) and losses (b) along with their direct energy and forces predictions (c–n) of DimeNet model against AIMD reference data for different materials

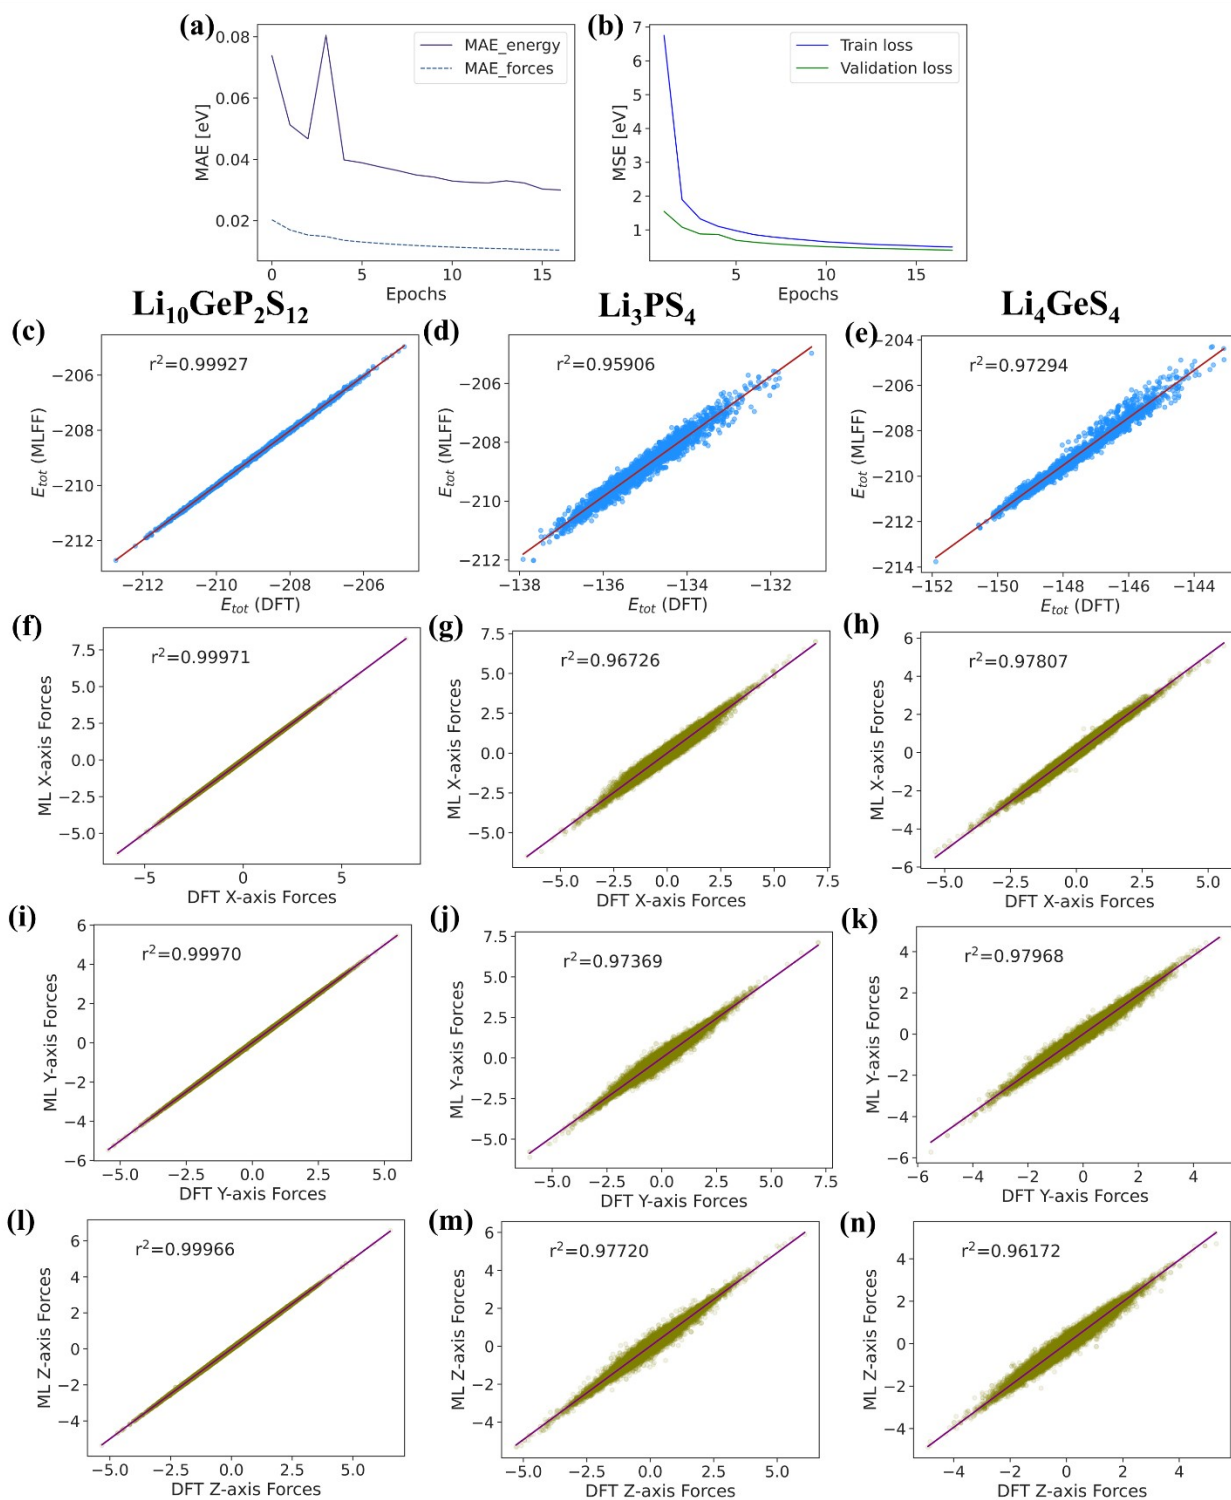

**Figure S4** Training metrics (a) and losses (b) along with their direct energy and forces predictions (c–n) of DimeNet++ model against AIMD reference data for different materials

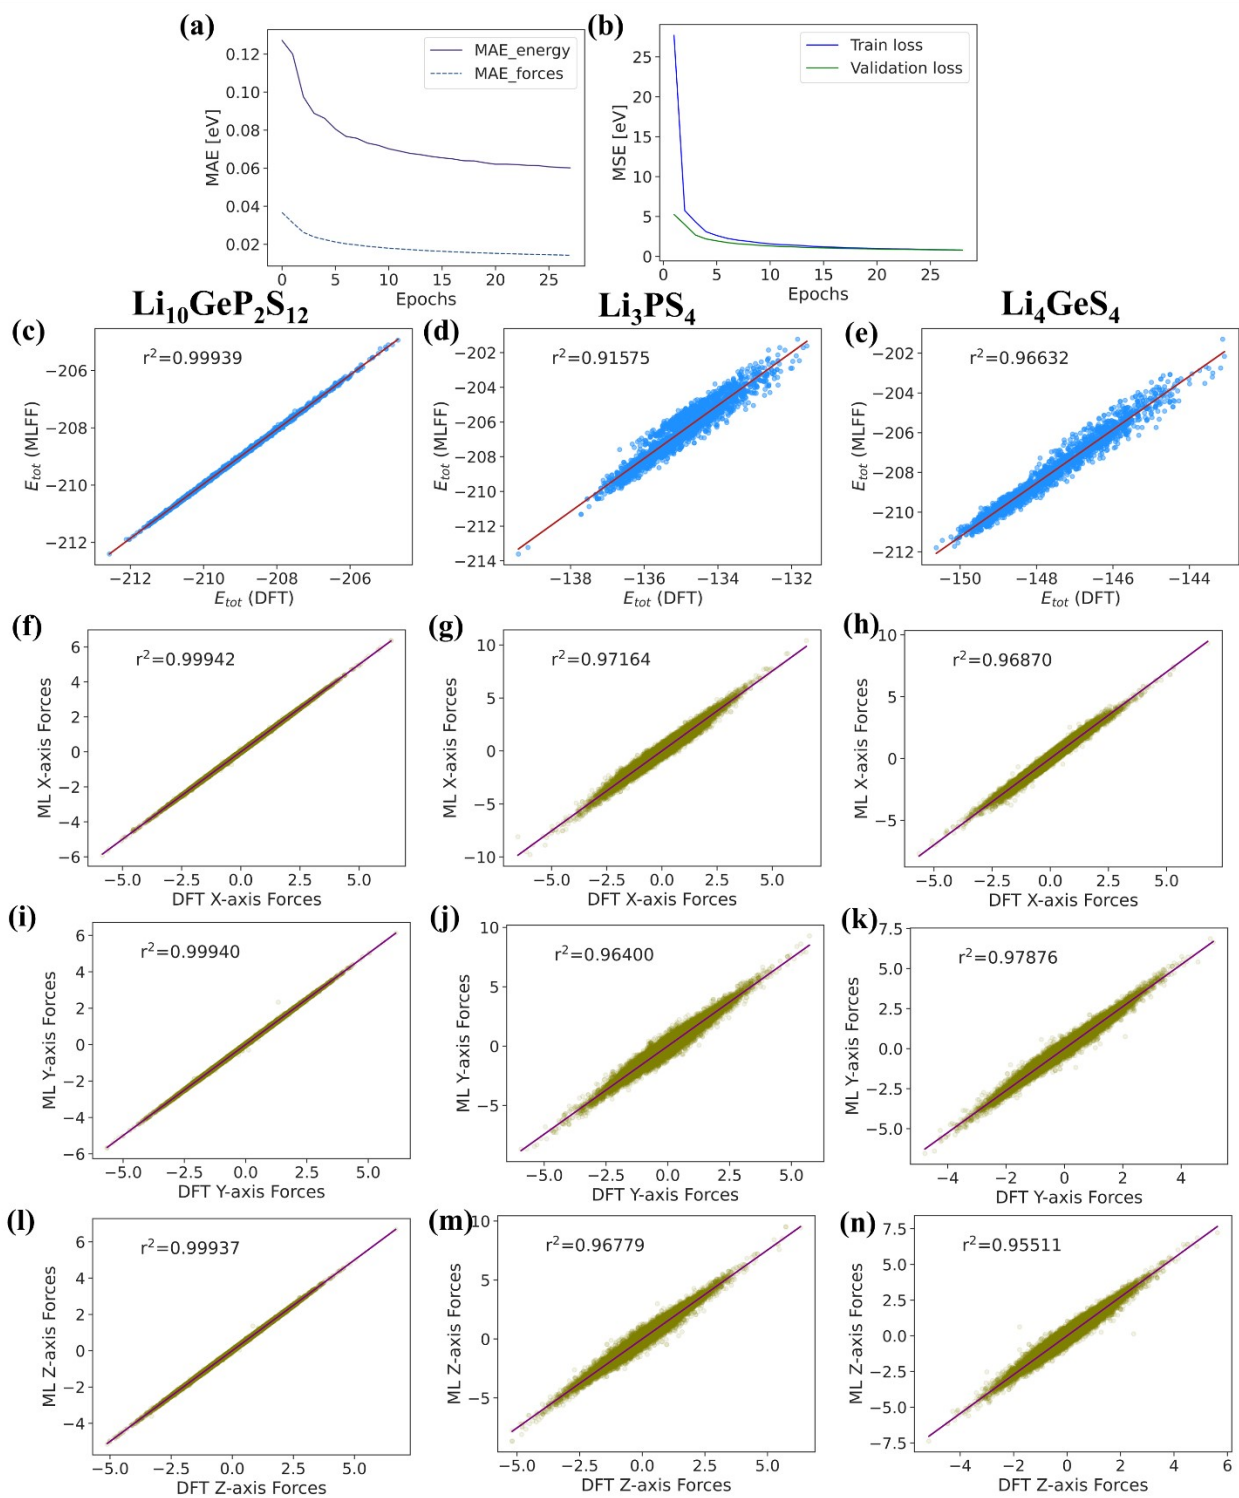

**Figure S5** Training metrics (a) and losses (b) along with their direct energy and forces predictions (c–n) of GNS-TAT model against AIMD reference data for different materials

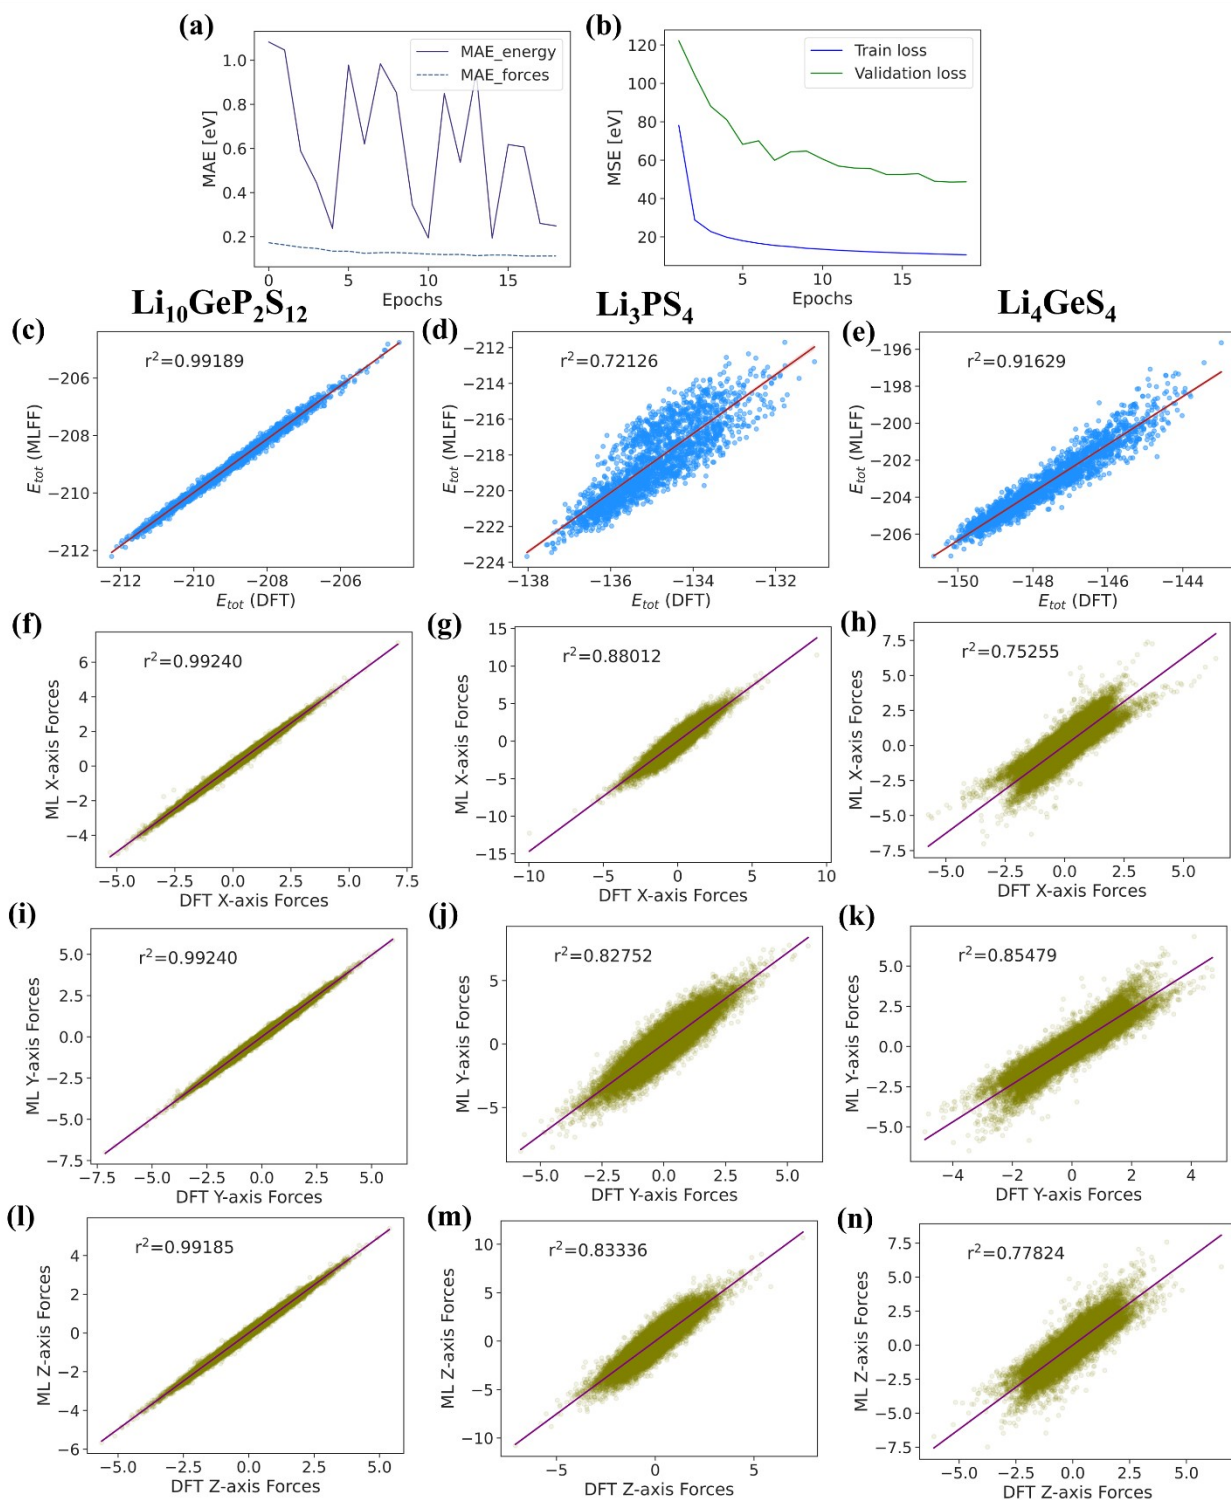

**Figure S6** Training metrics (a) and losses (b) along with their direct energy and forces predictions (c–n) of DeeperGATGNN model against AIMD reference data for different materials



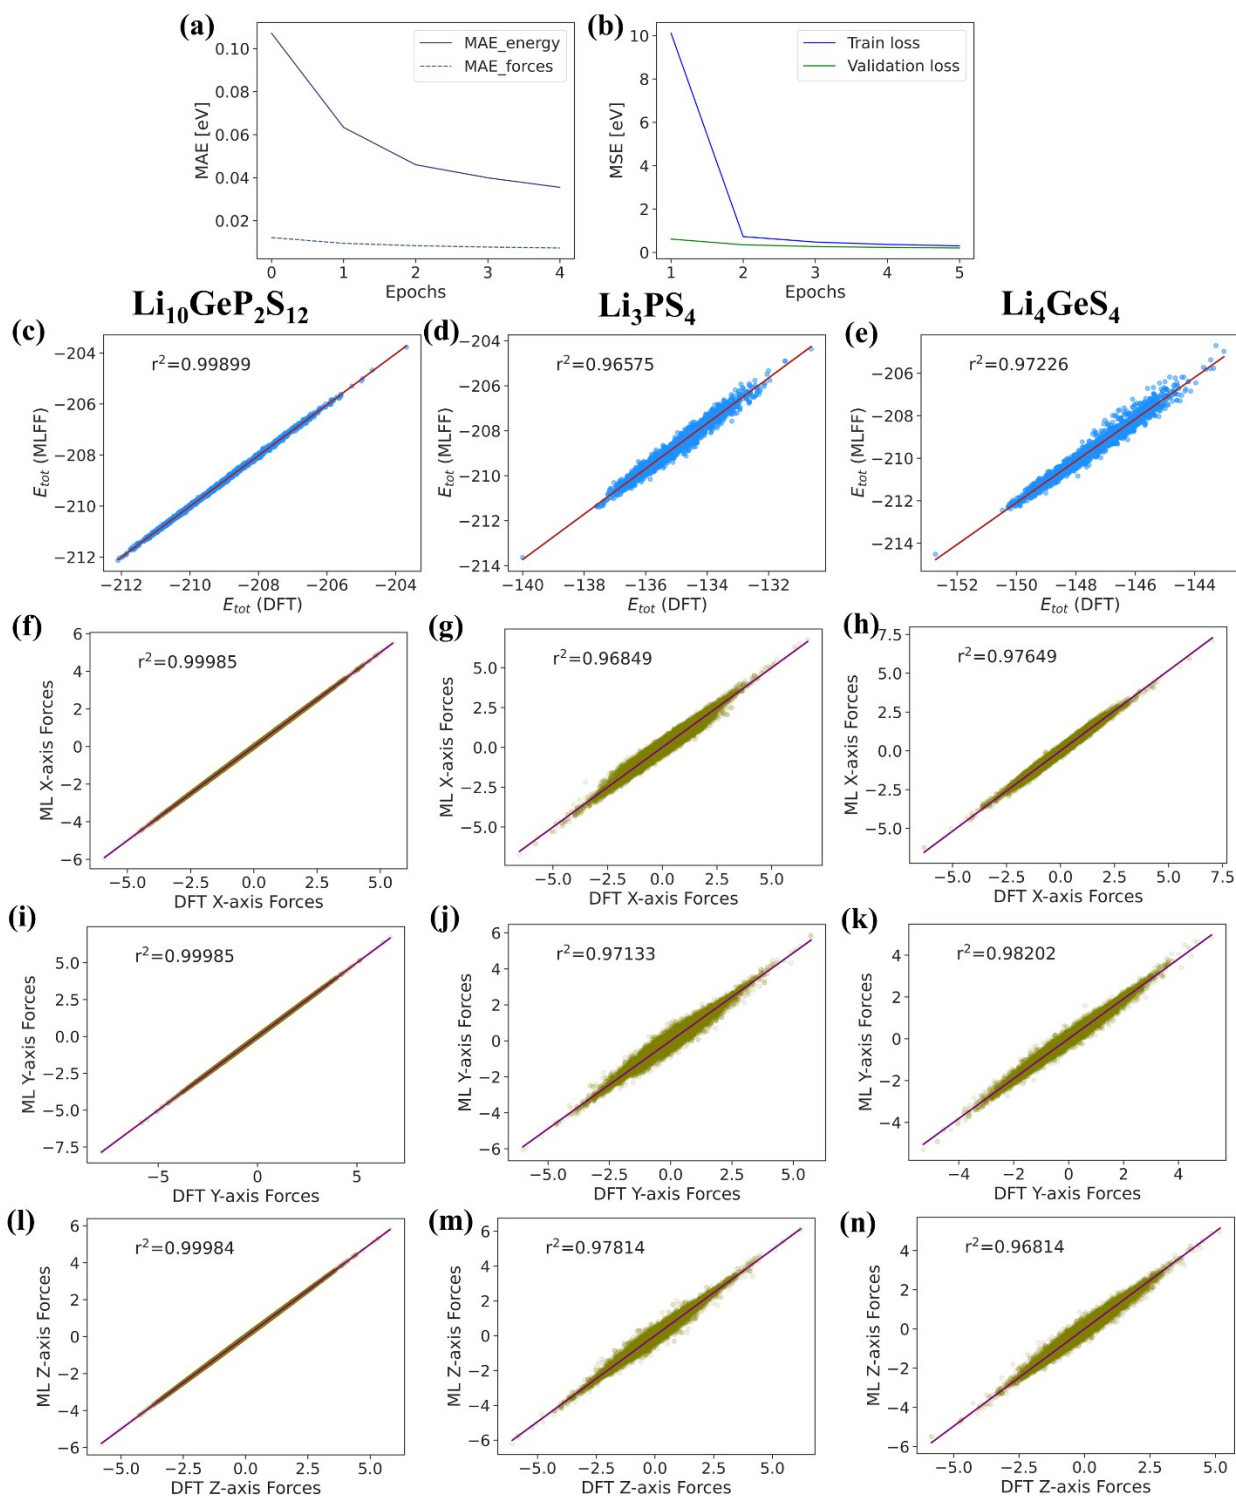

**Figure S7** Training metrics (a) and losses (b) along with their direct energy and forces predictions (c–n) of SCN model against AIMD reference data for different materials

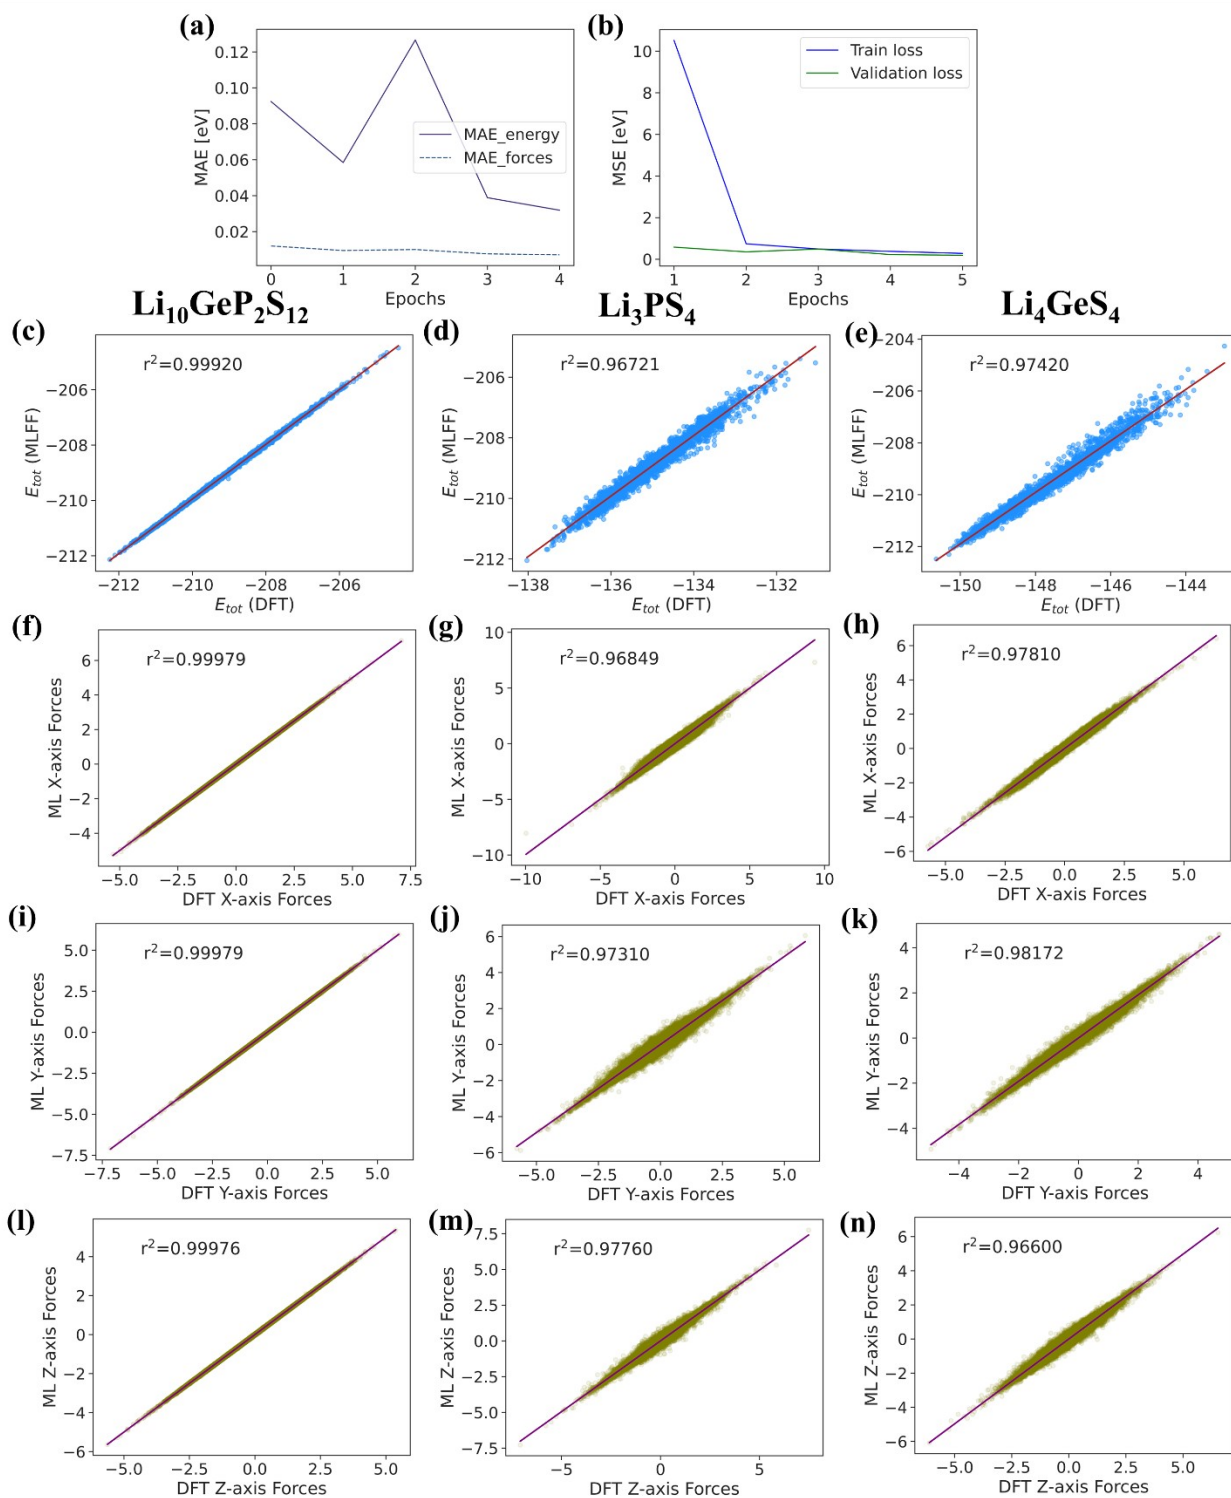

**Figure S8** Training metrics (a) and losses (b) along with their direct energy and forces predictions (c–n) of eSCN model against AIMD reference data for different materials

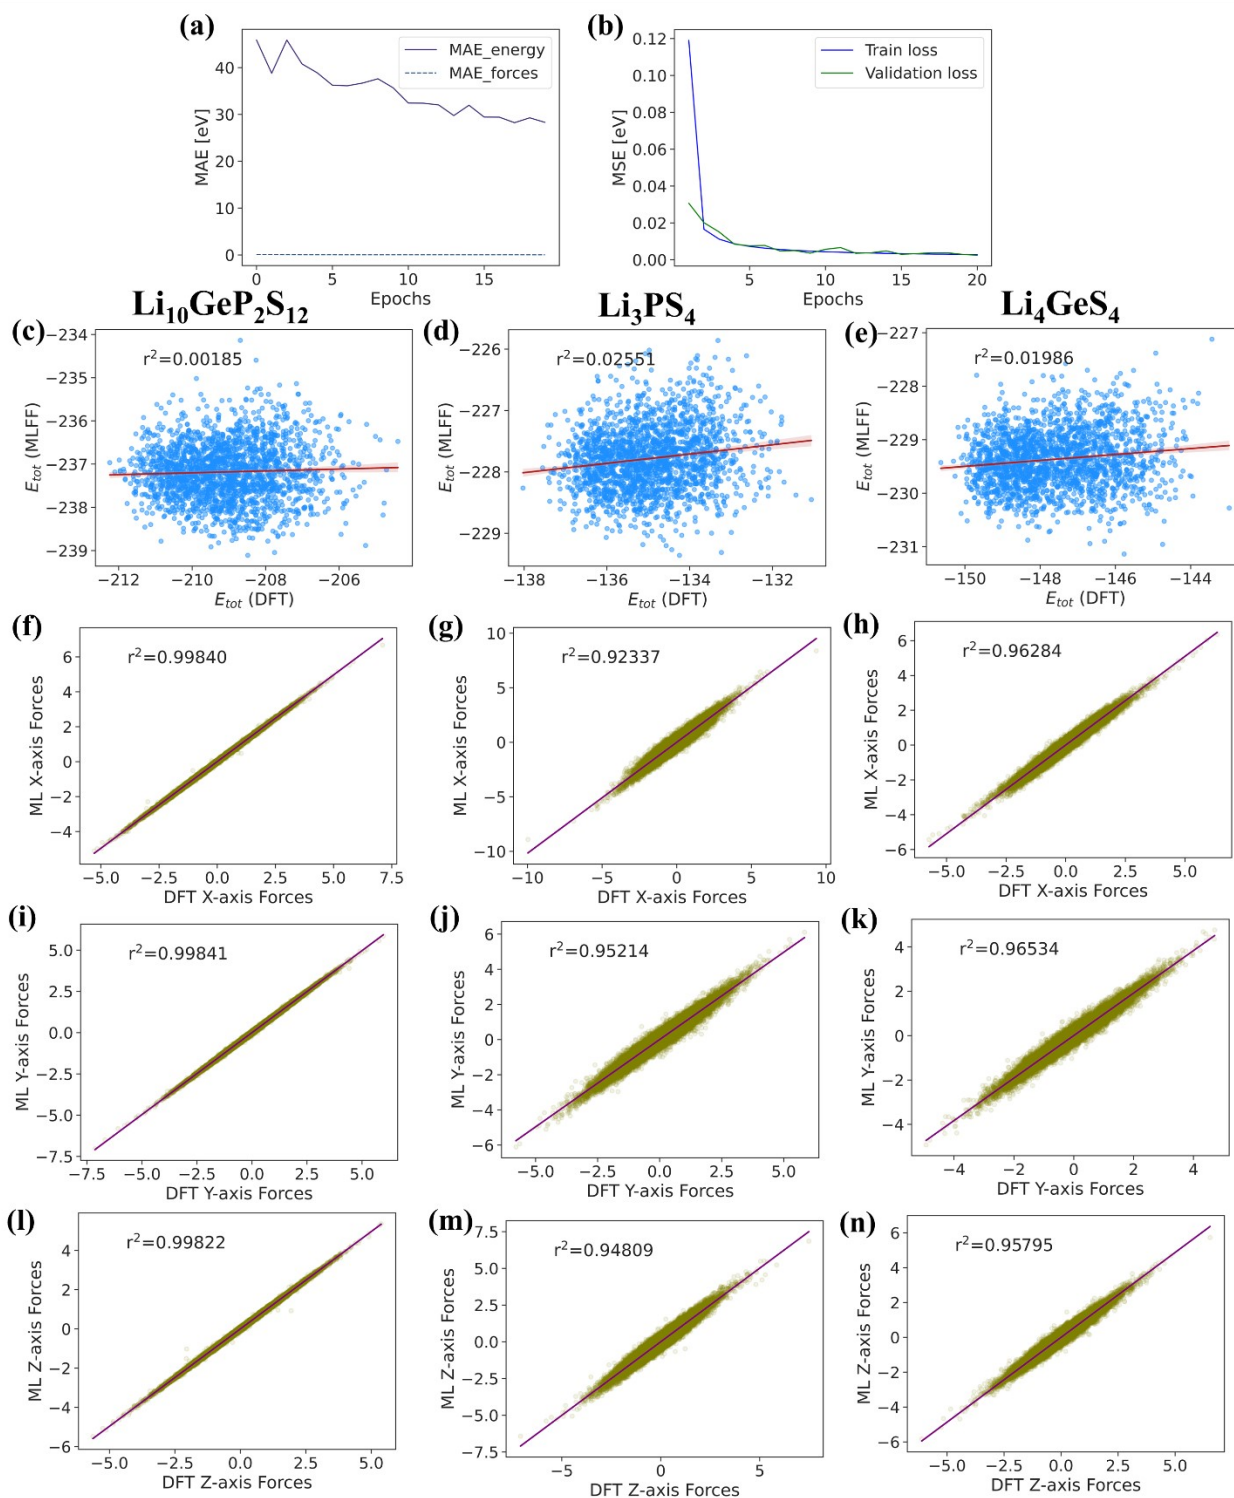

**Figure S9** Training metrics (a) and losses (b) along with their direct energy and forces predictions (c–n) of ForceNet model against AIMD reference data for different materials

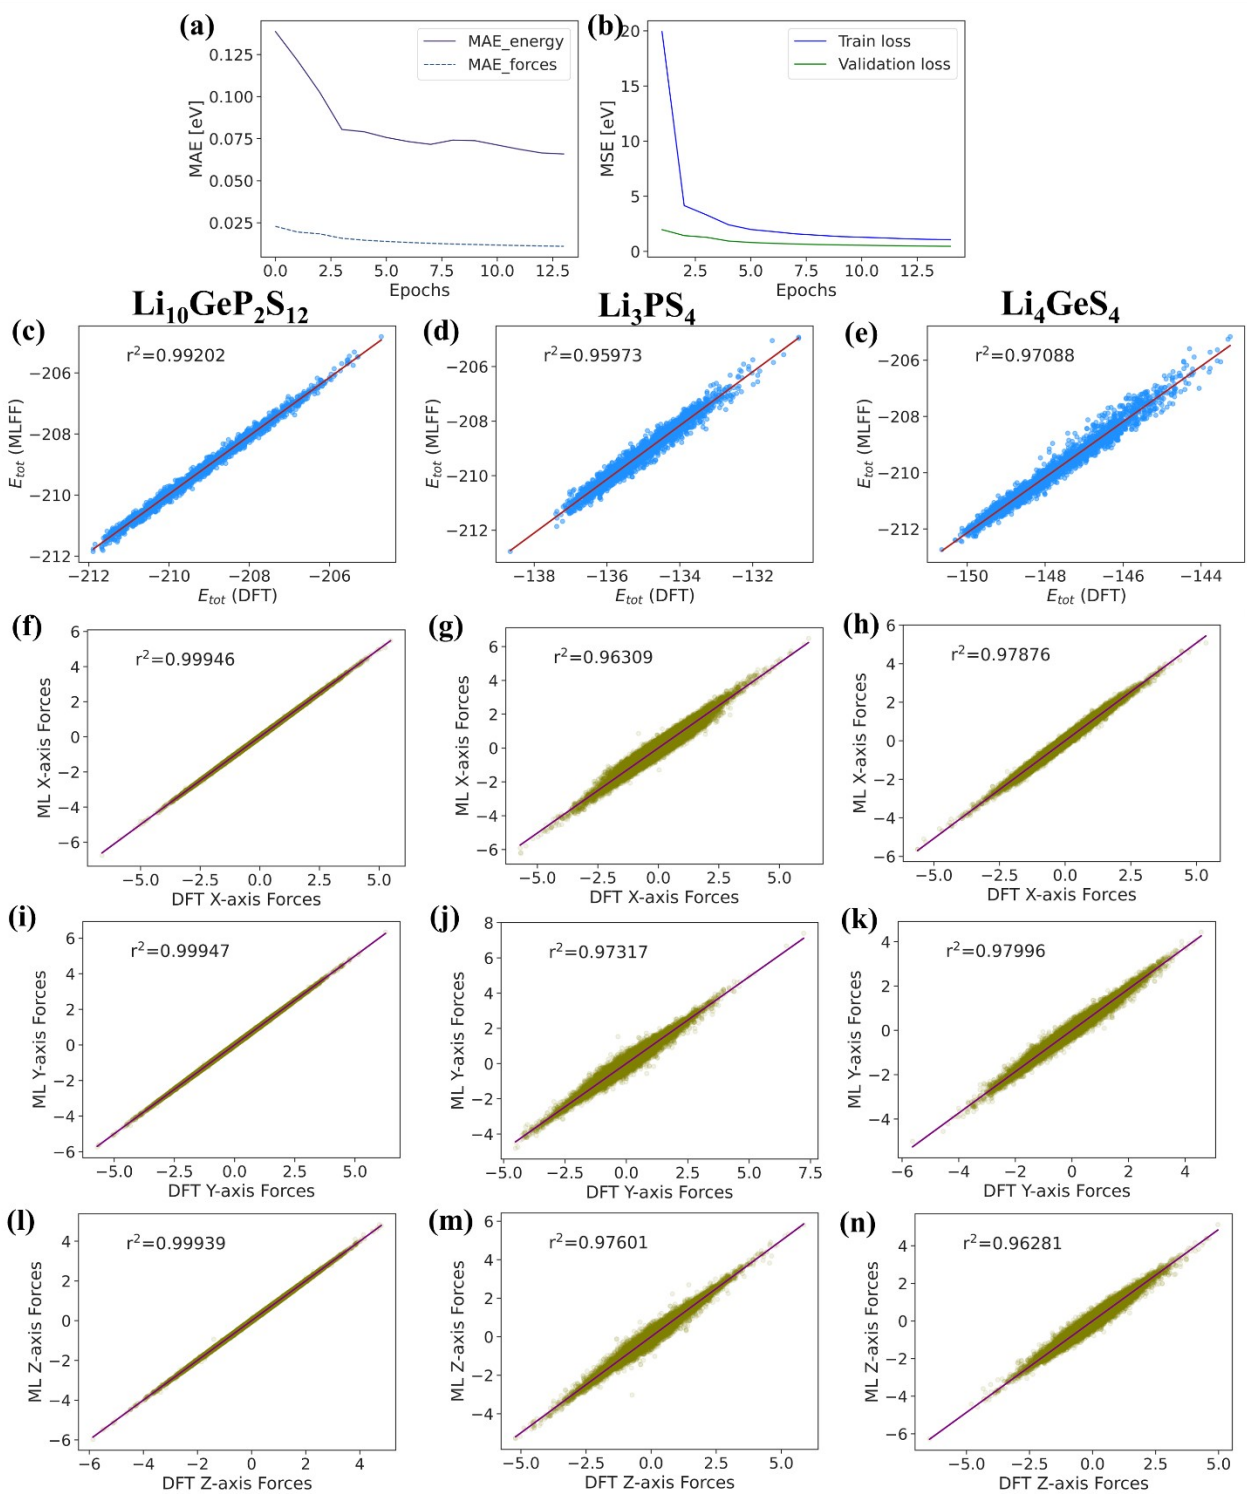

**Figure S10** Training metrics (a) and losses (b) along with their direct energy and forces predictions (c–n) of Equiformer model against AIMD reference data for different materials

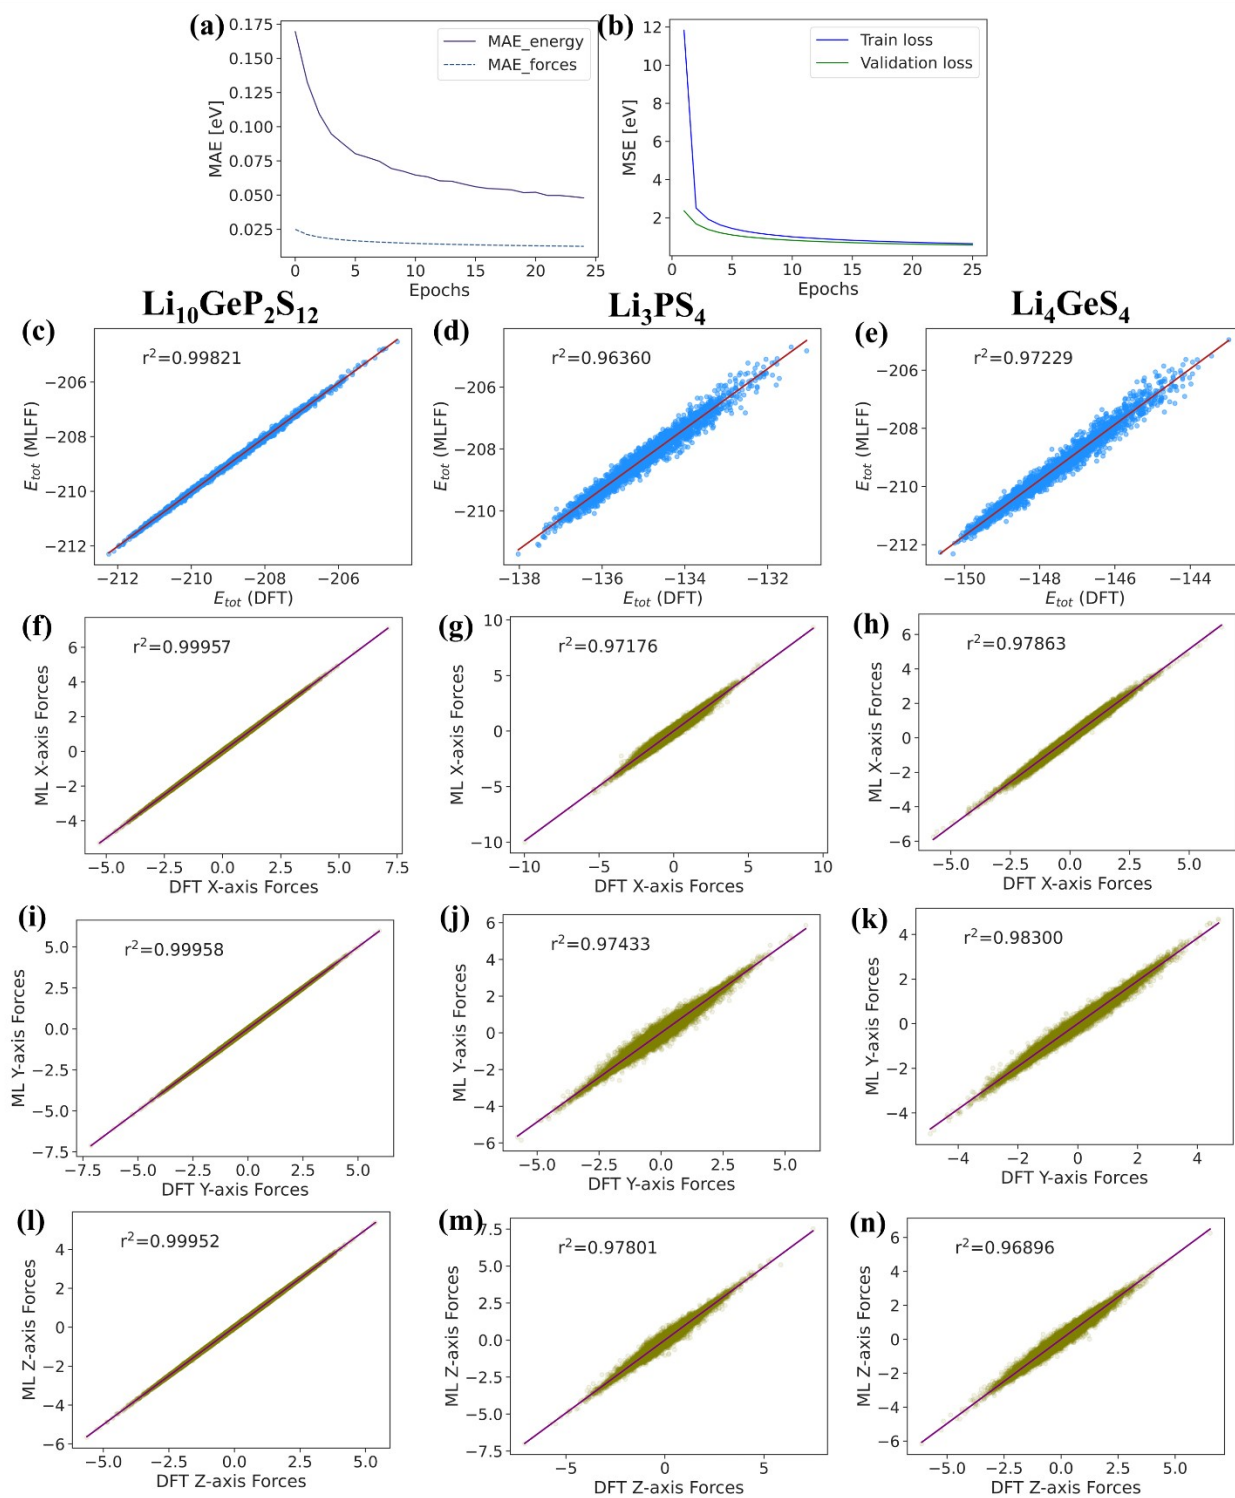

**Figure S11** Training metrics (a) and losses (b) along with their direct energy and forces predictions (c–n) of LeftNet model against AIMD reference data for different materials

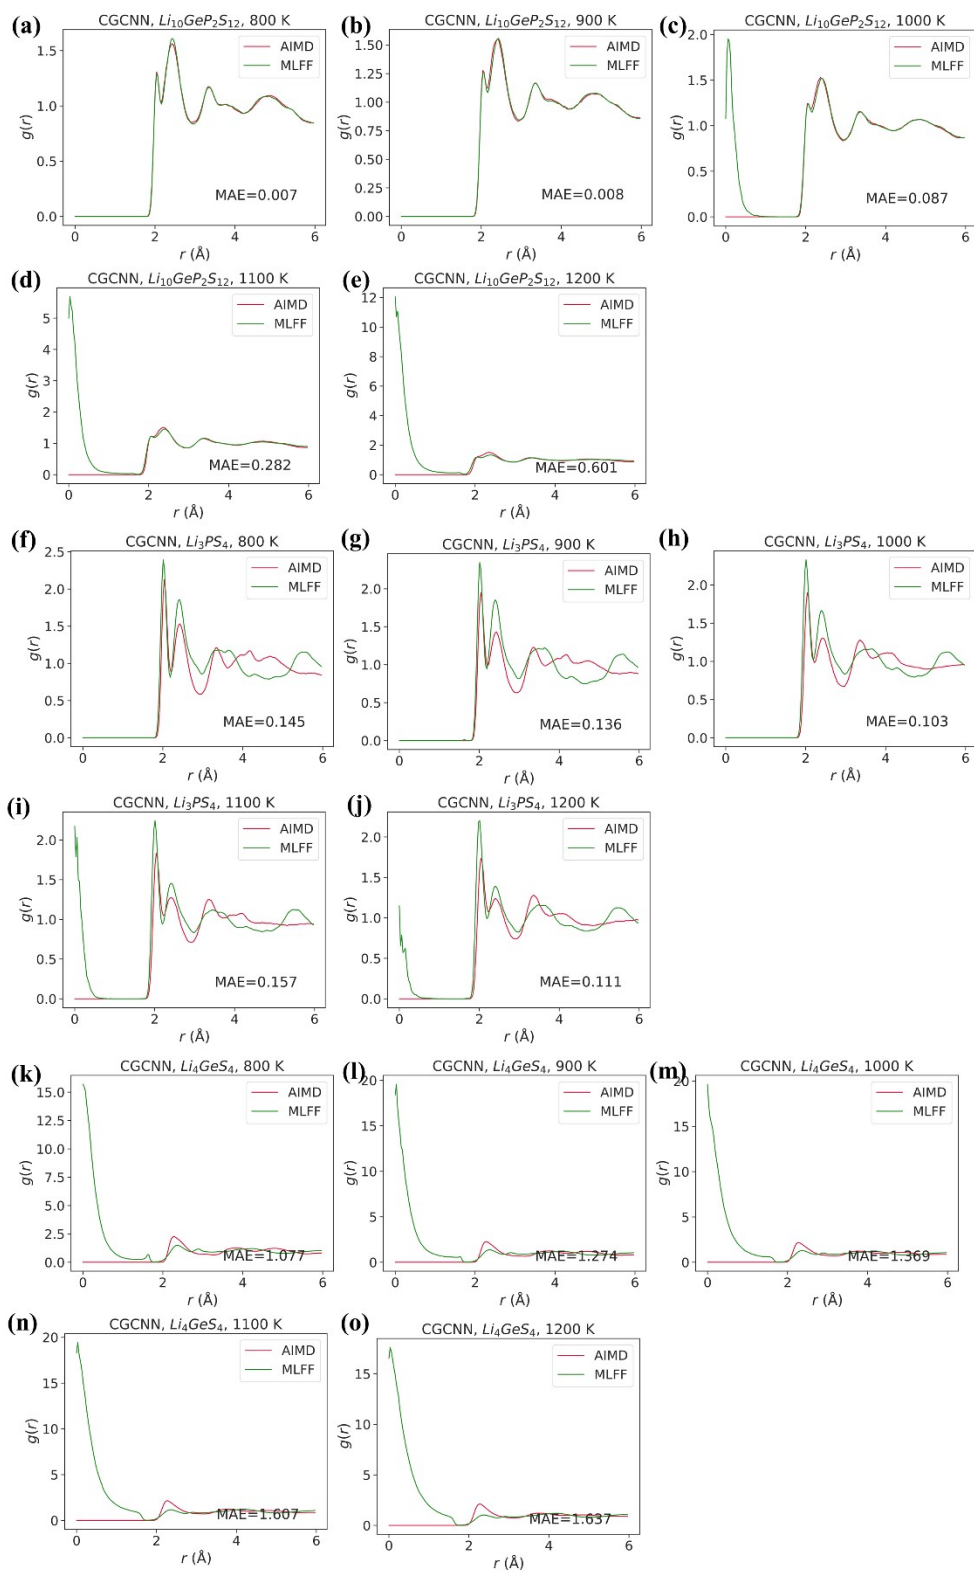

**Figure S12** Radial distribution function prediction of CGCNN model against AIMD reference data for different materials

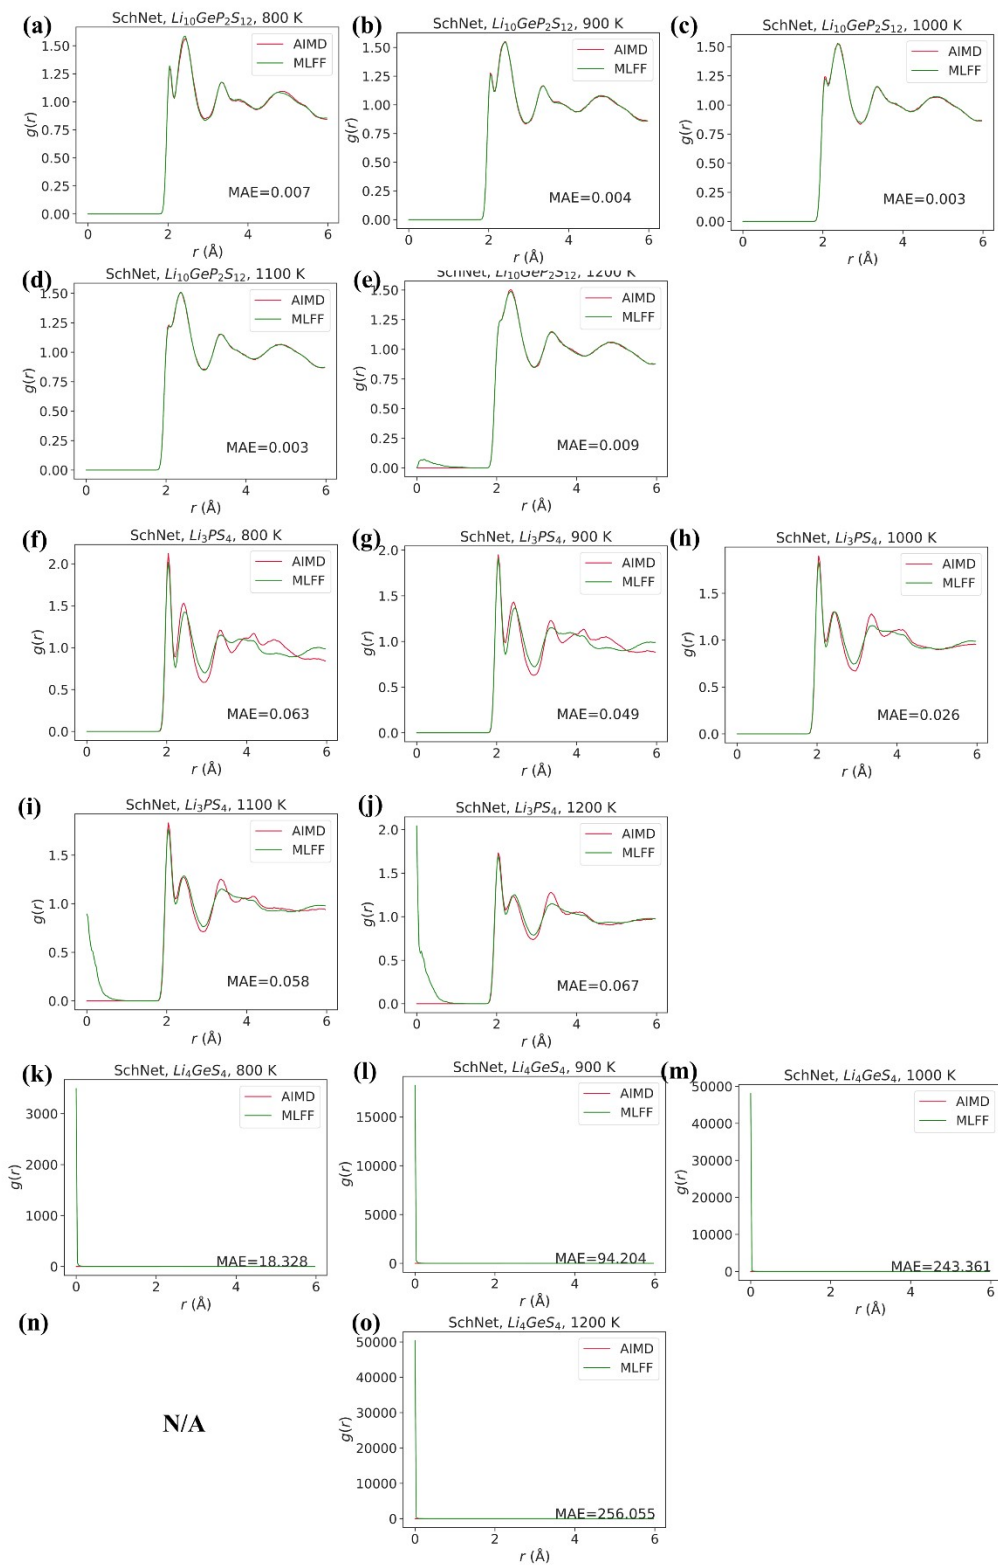

**Figure S13** Radial distribution function prediction of SchNet model against AIMD reference data for different materials

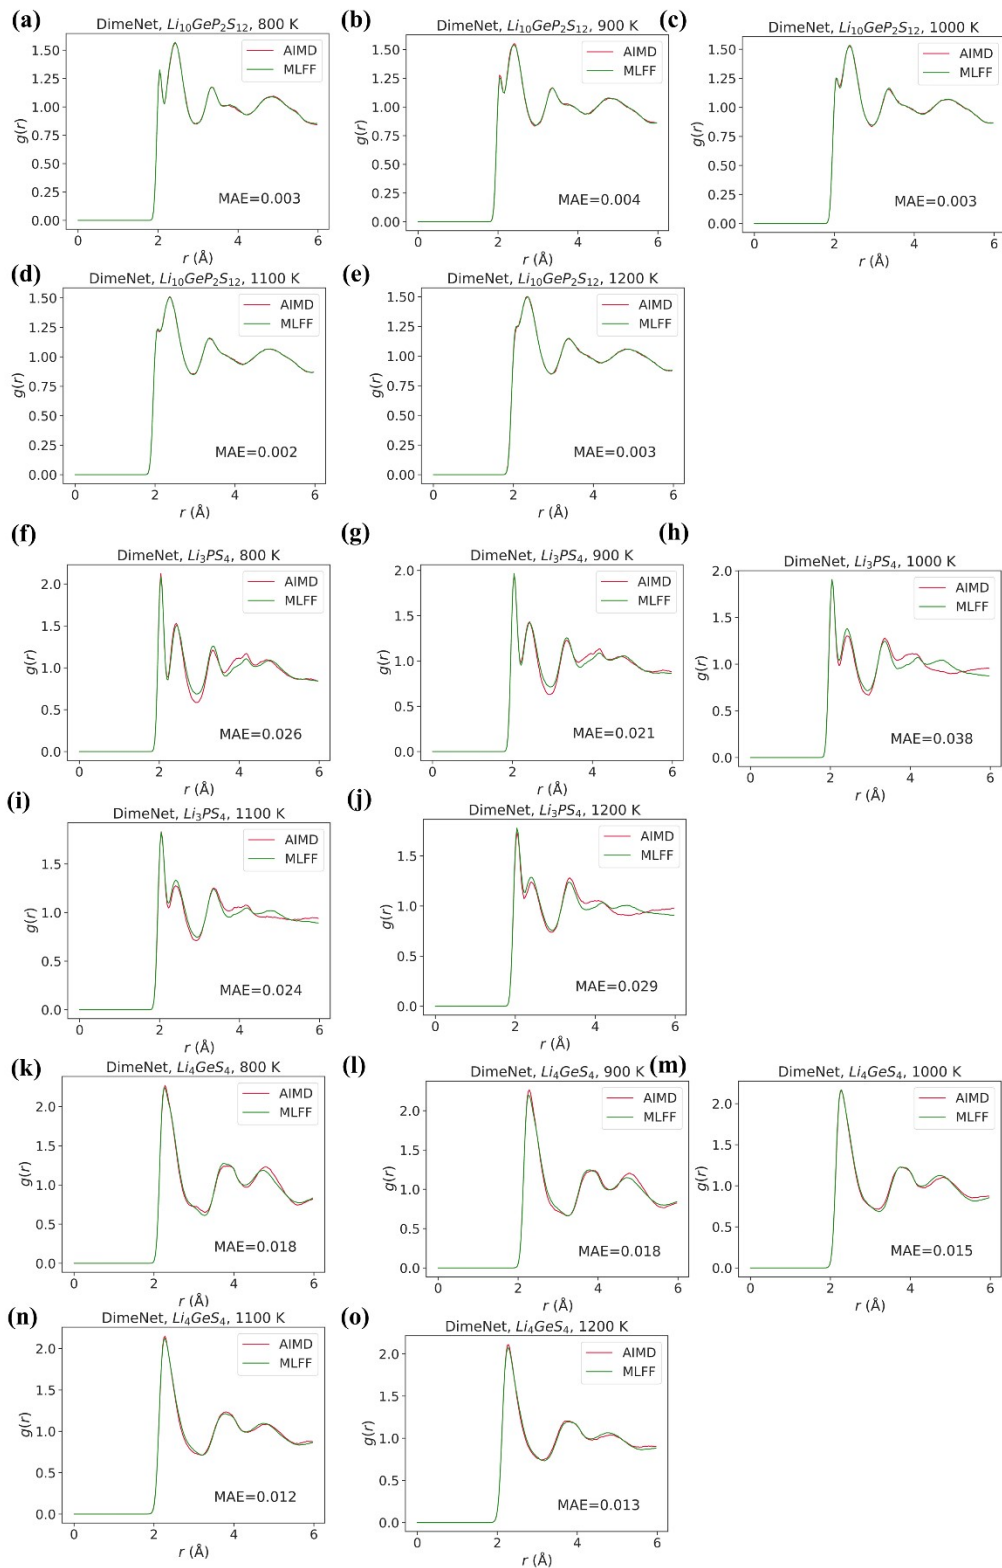

**Figure S14** Radial distribution function prediction of DimeNet model against AIMD reference data for different materials



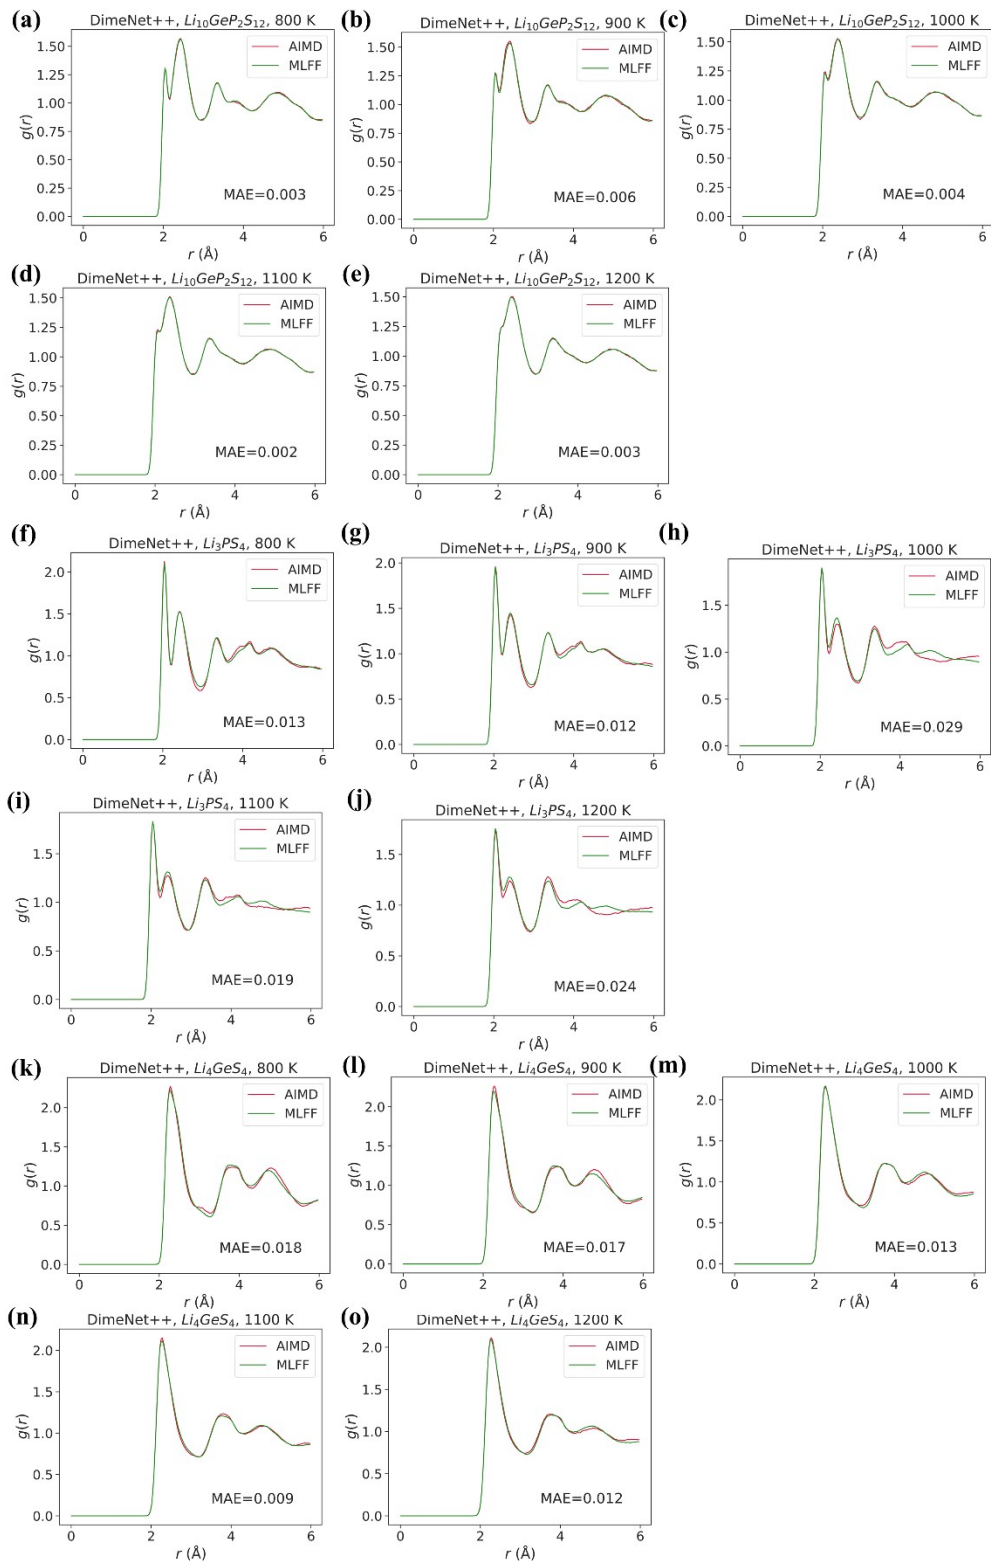

**Figure S15** Radial distribution function prediction of DimeNet++ model against AIMD reference data for different materials

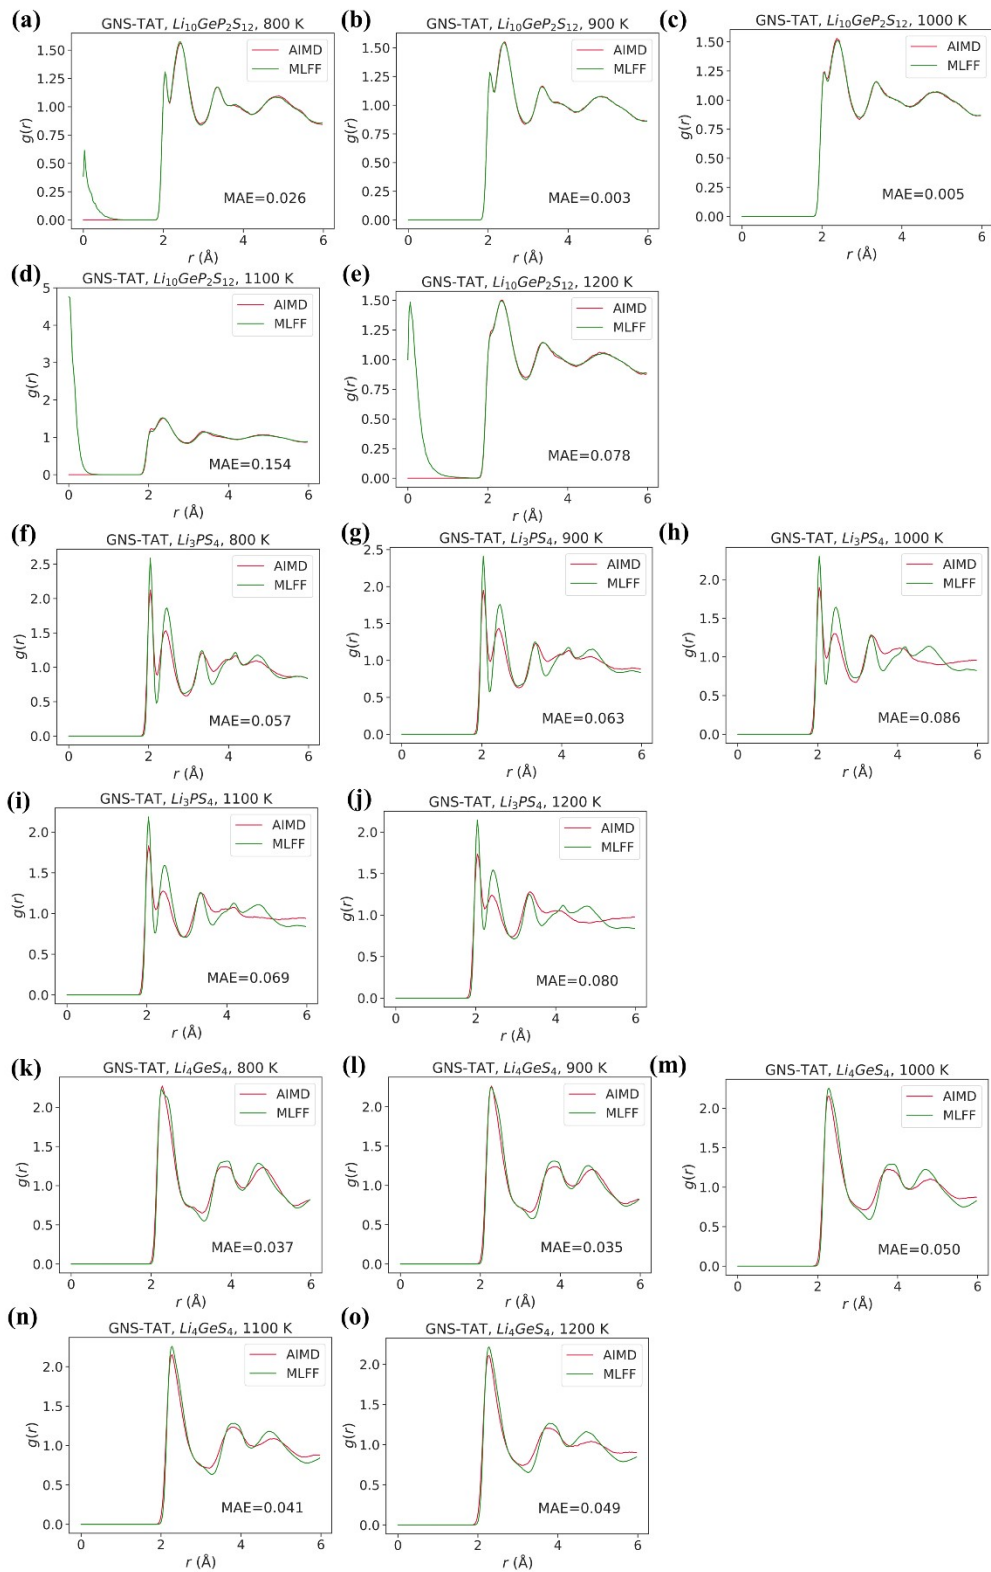

**Figure S16** Radial distribution function prediction of GNS-TAT model against AIMD reference data for different materials

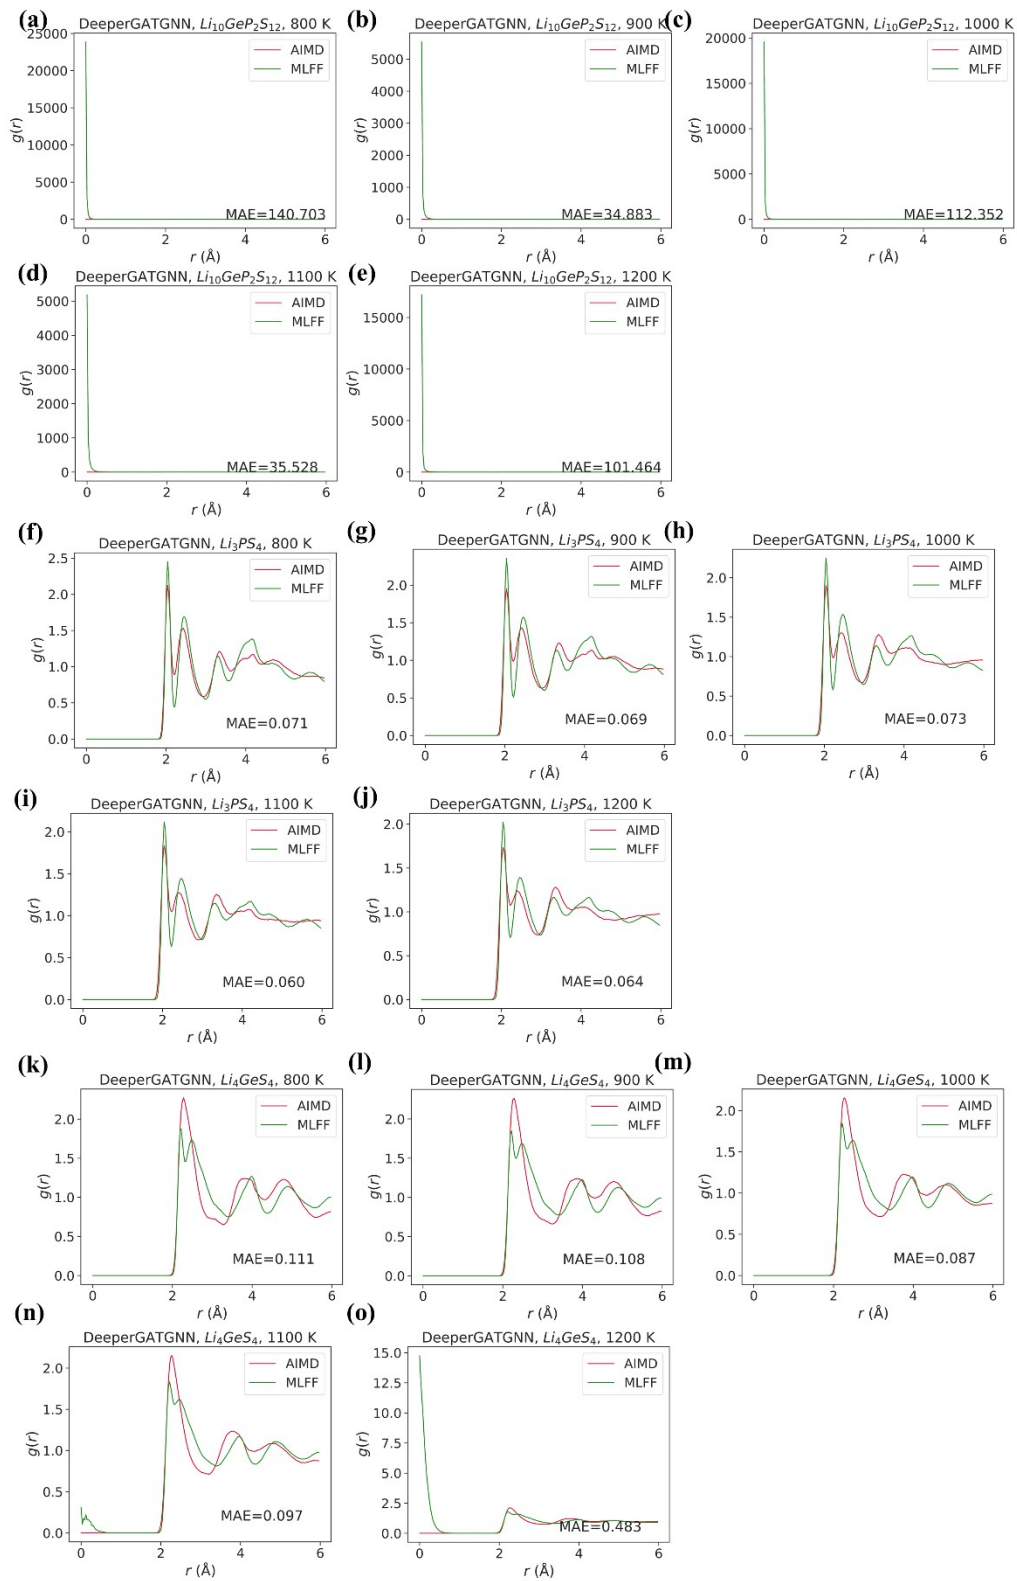

**Figure S17** Radial distribution function prediction of DeeperGATGNN model against AIMD reference data for different materials

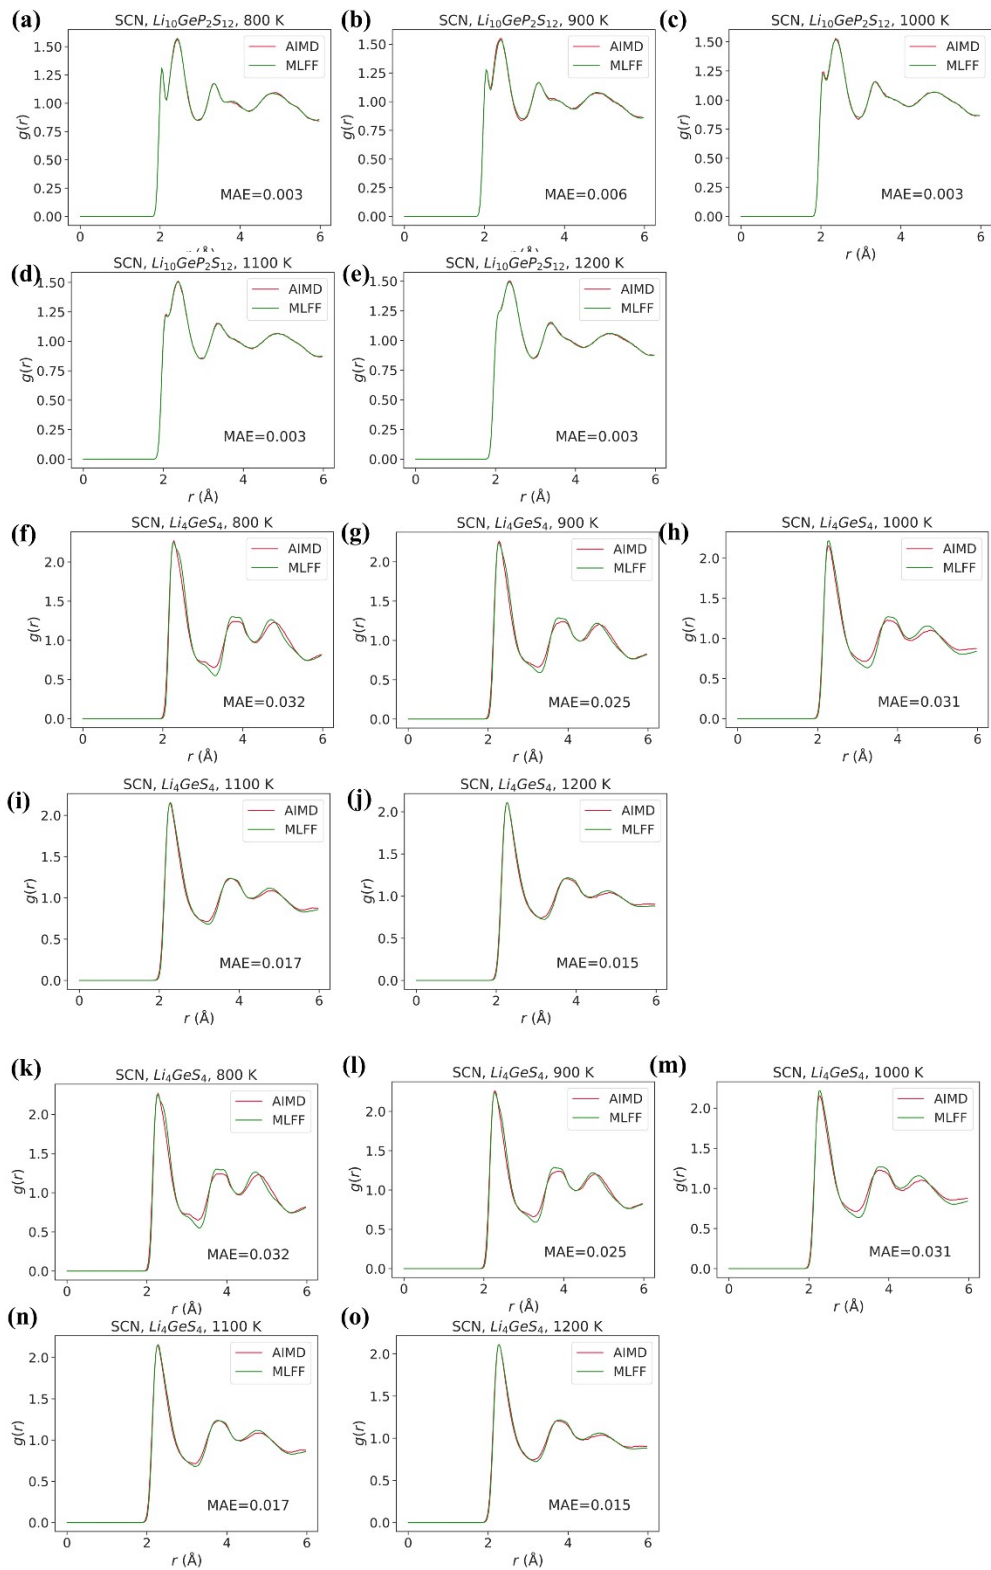

**Figure S18** Radial distribution function prediction of SCN model against AIMD reference data for different materials

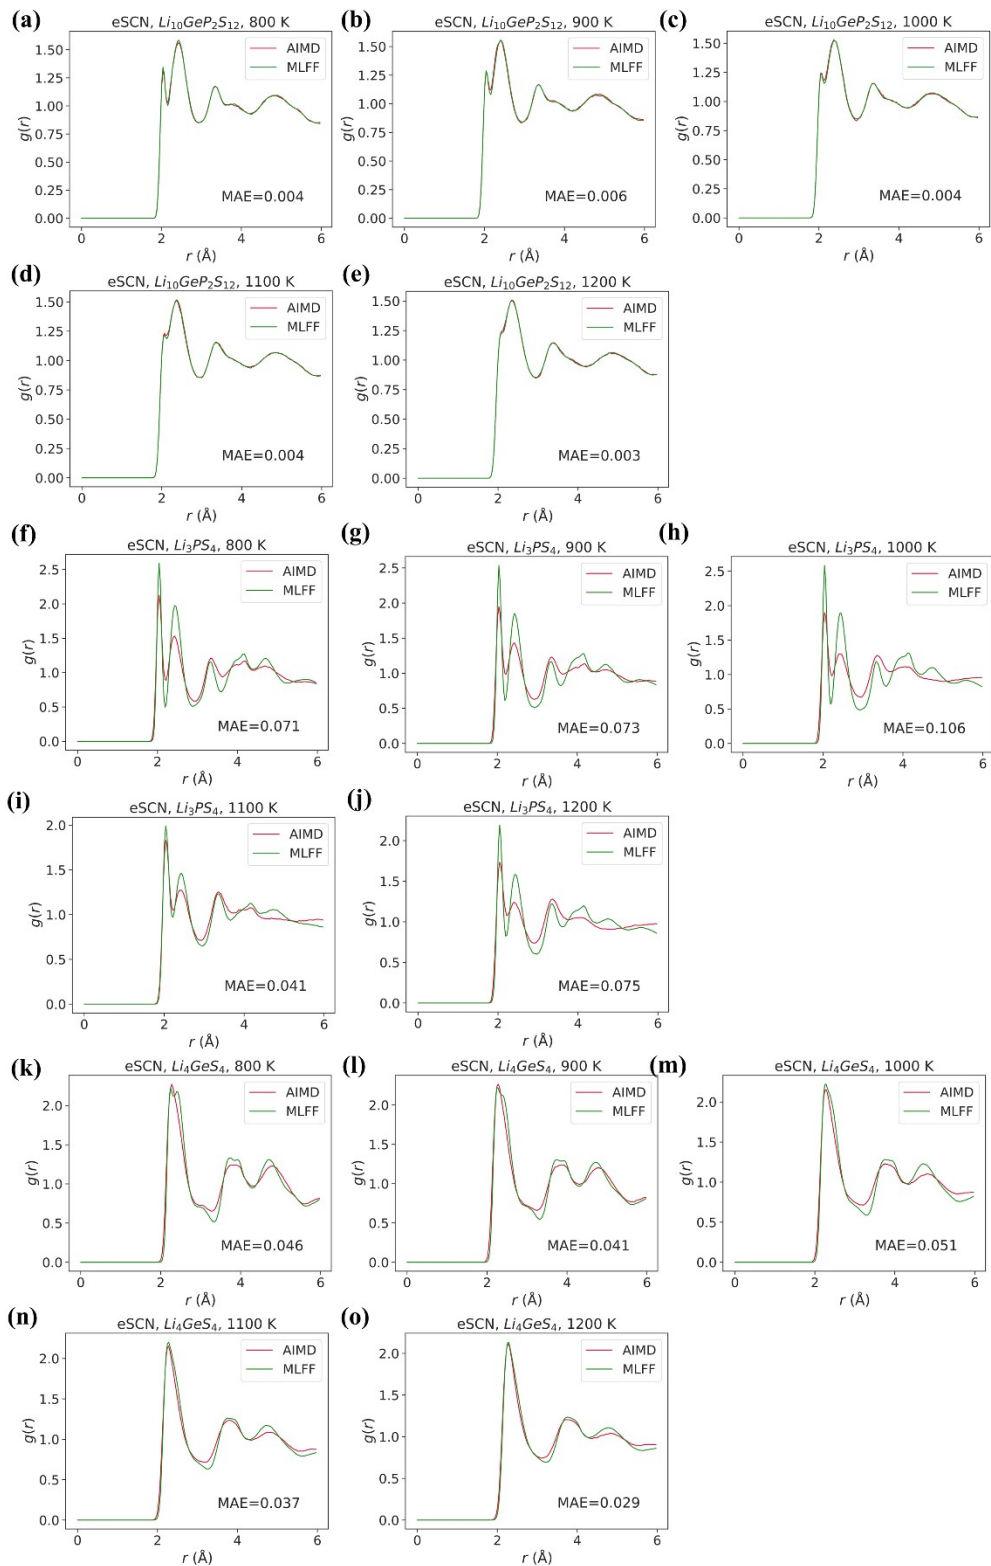

**Figure S19** Radial distribution function prediction of eSCN model against AIMD reference data for different materials

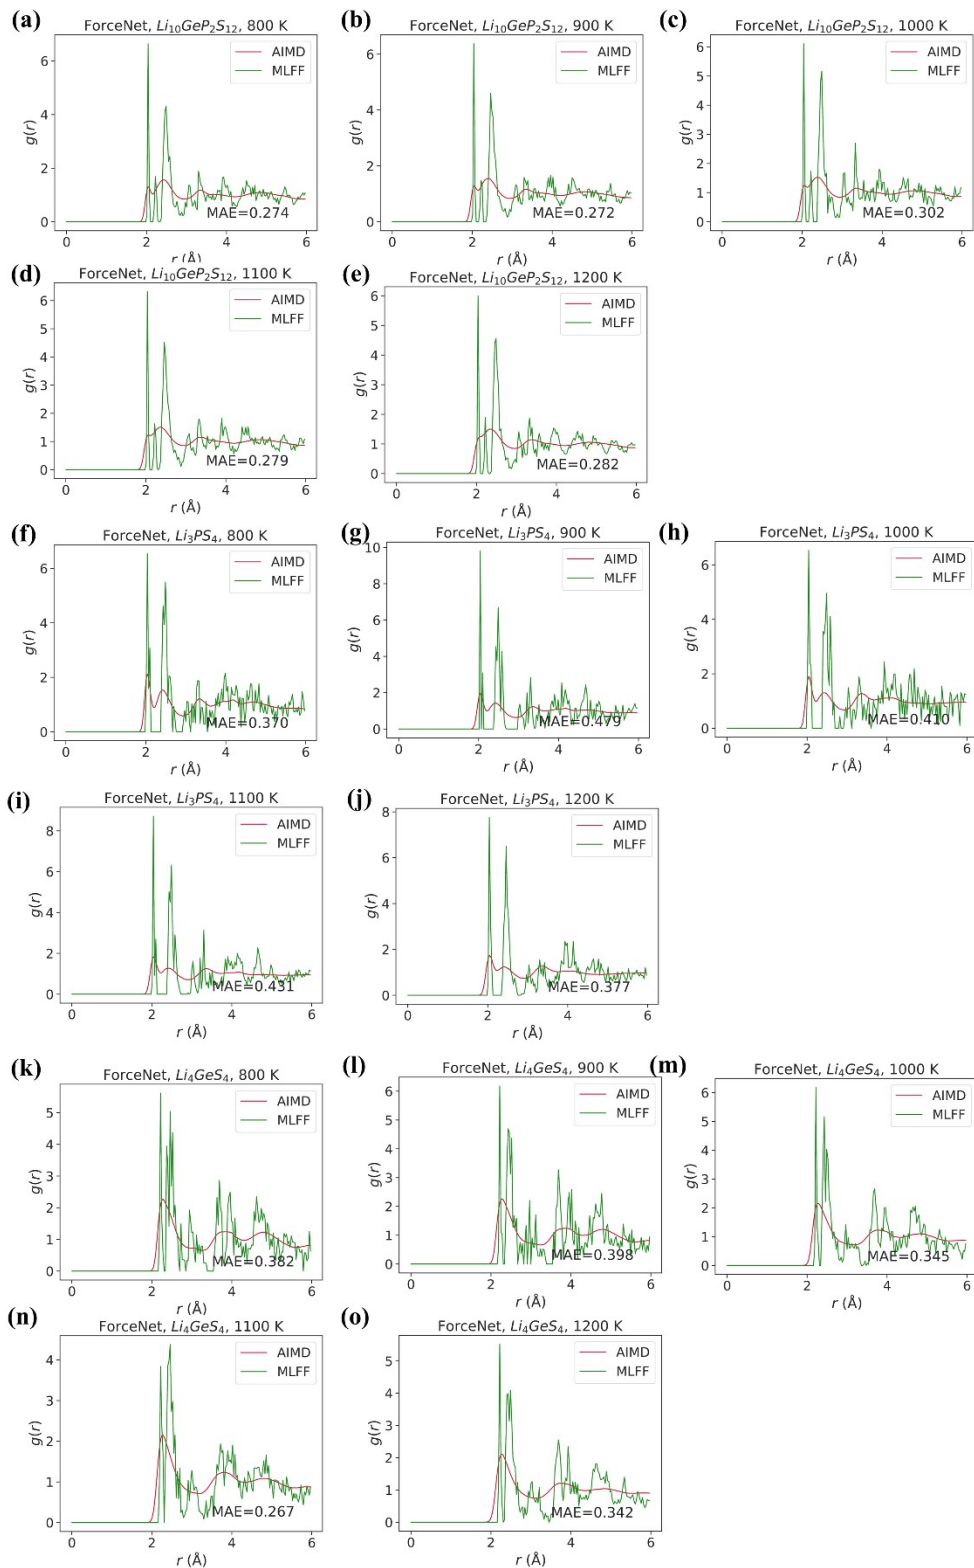

**Figure S20** Radial distribution function prediction of ForceNet model against AIMD reference data for different materials

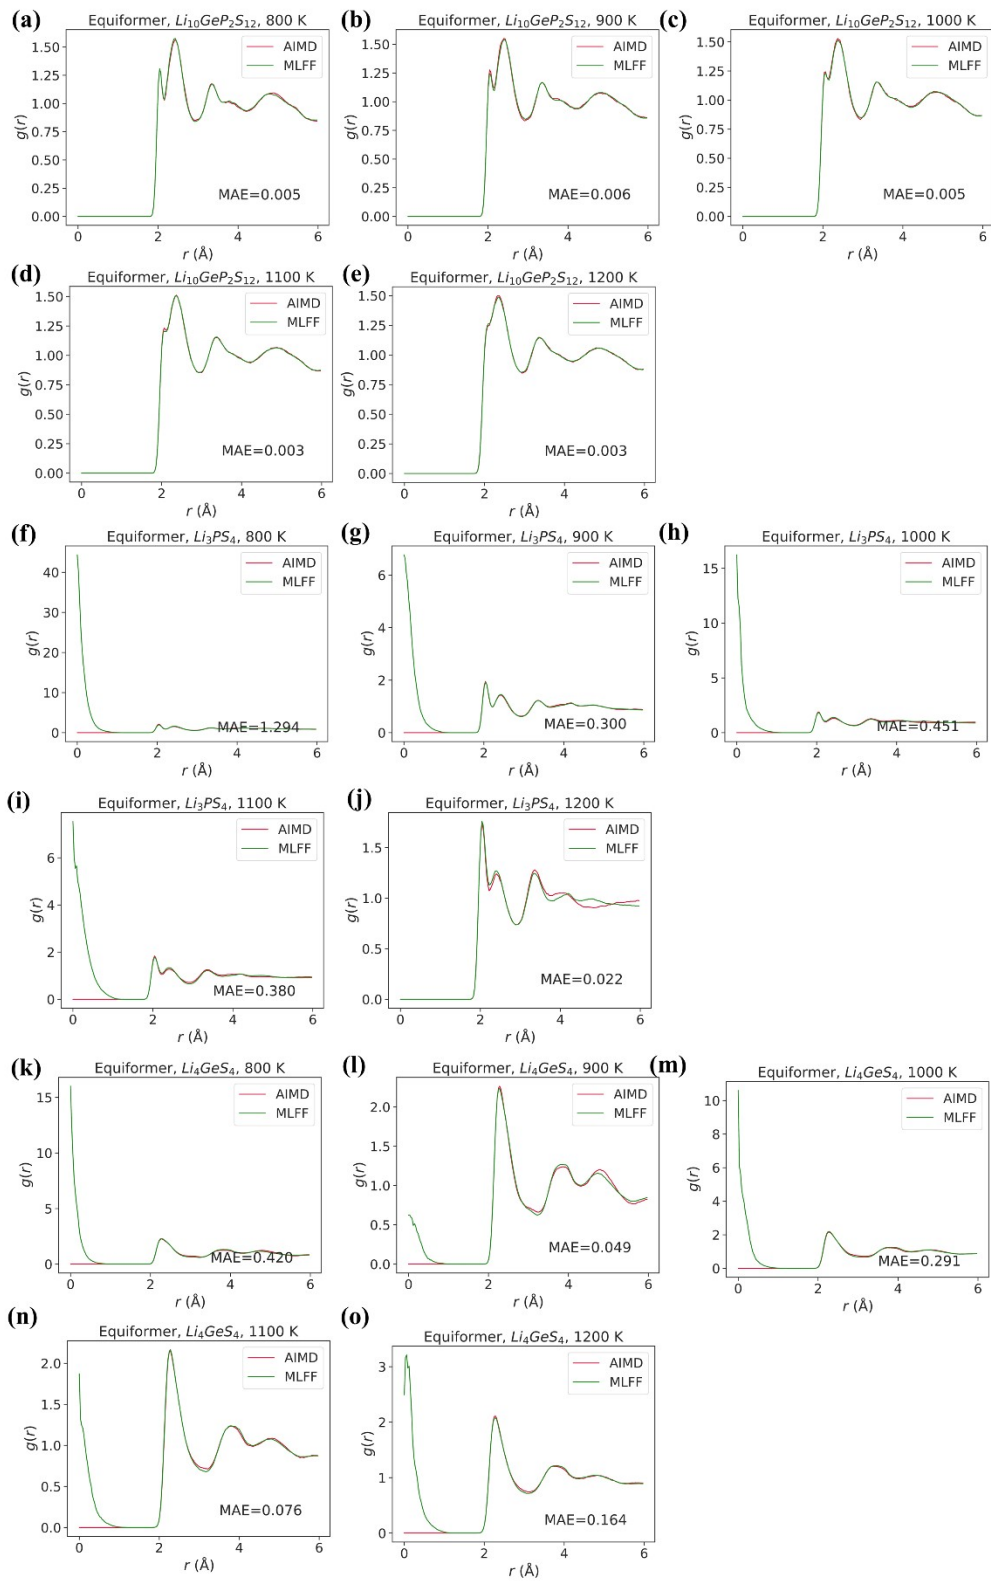

**Figure S21** Radial distribution function prediction of Equiformer model against AIMD reference data for different materials

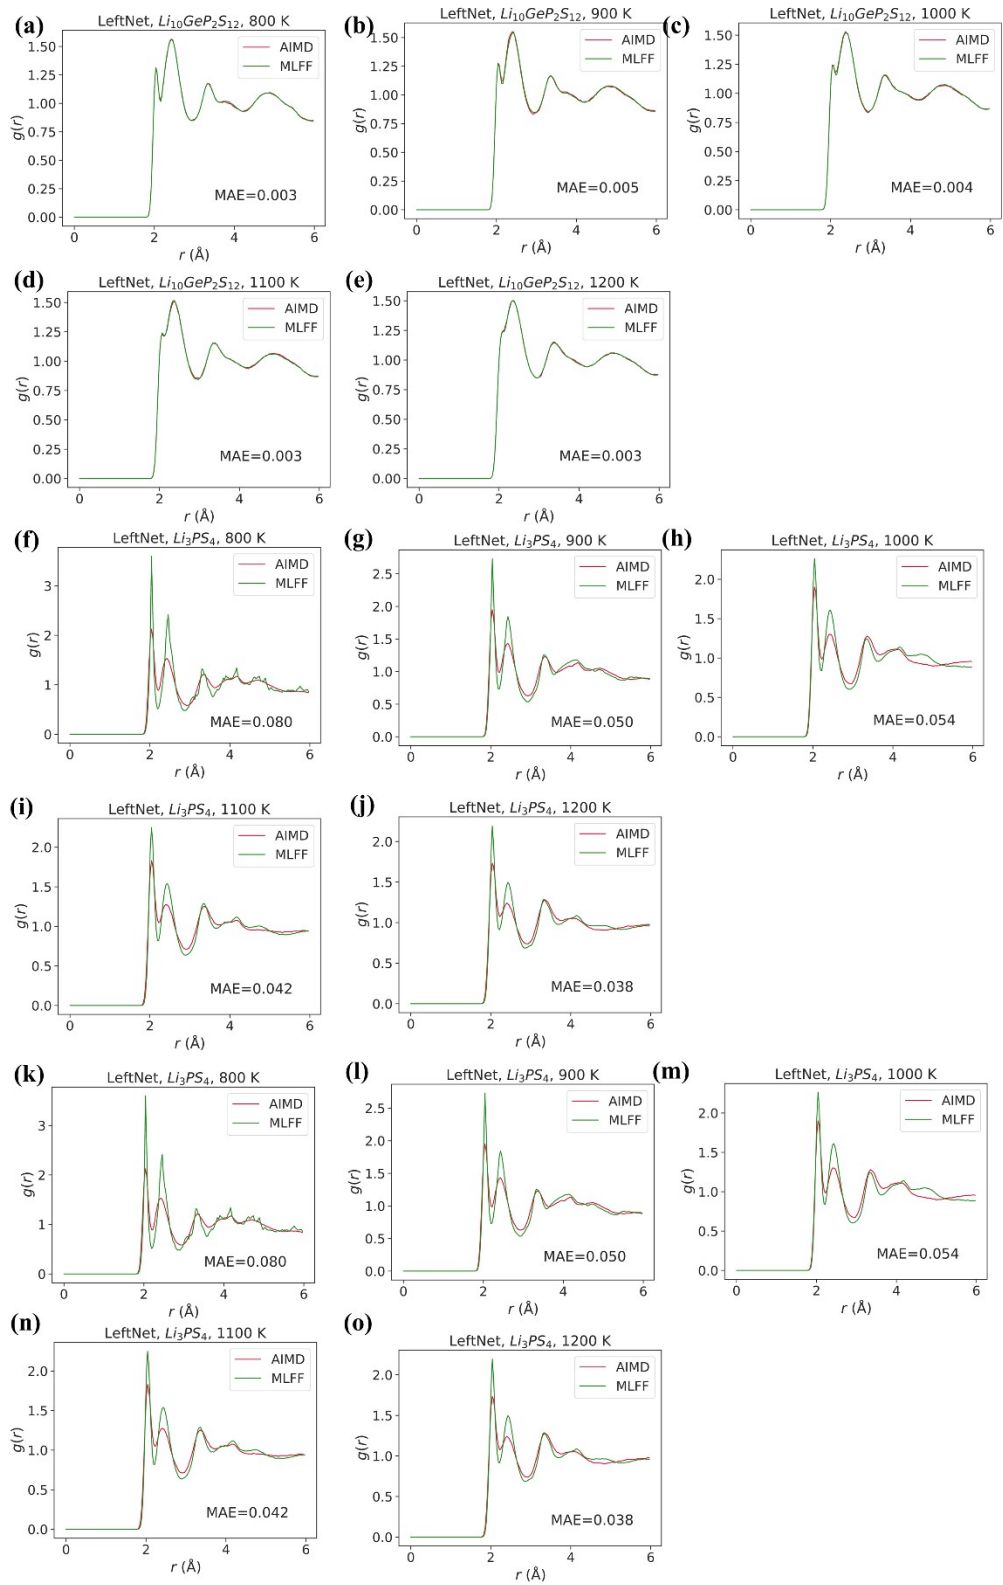

**Figure S22** Radial distribution function prediction of LeftNet model against AIMD reference data for different materials



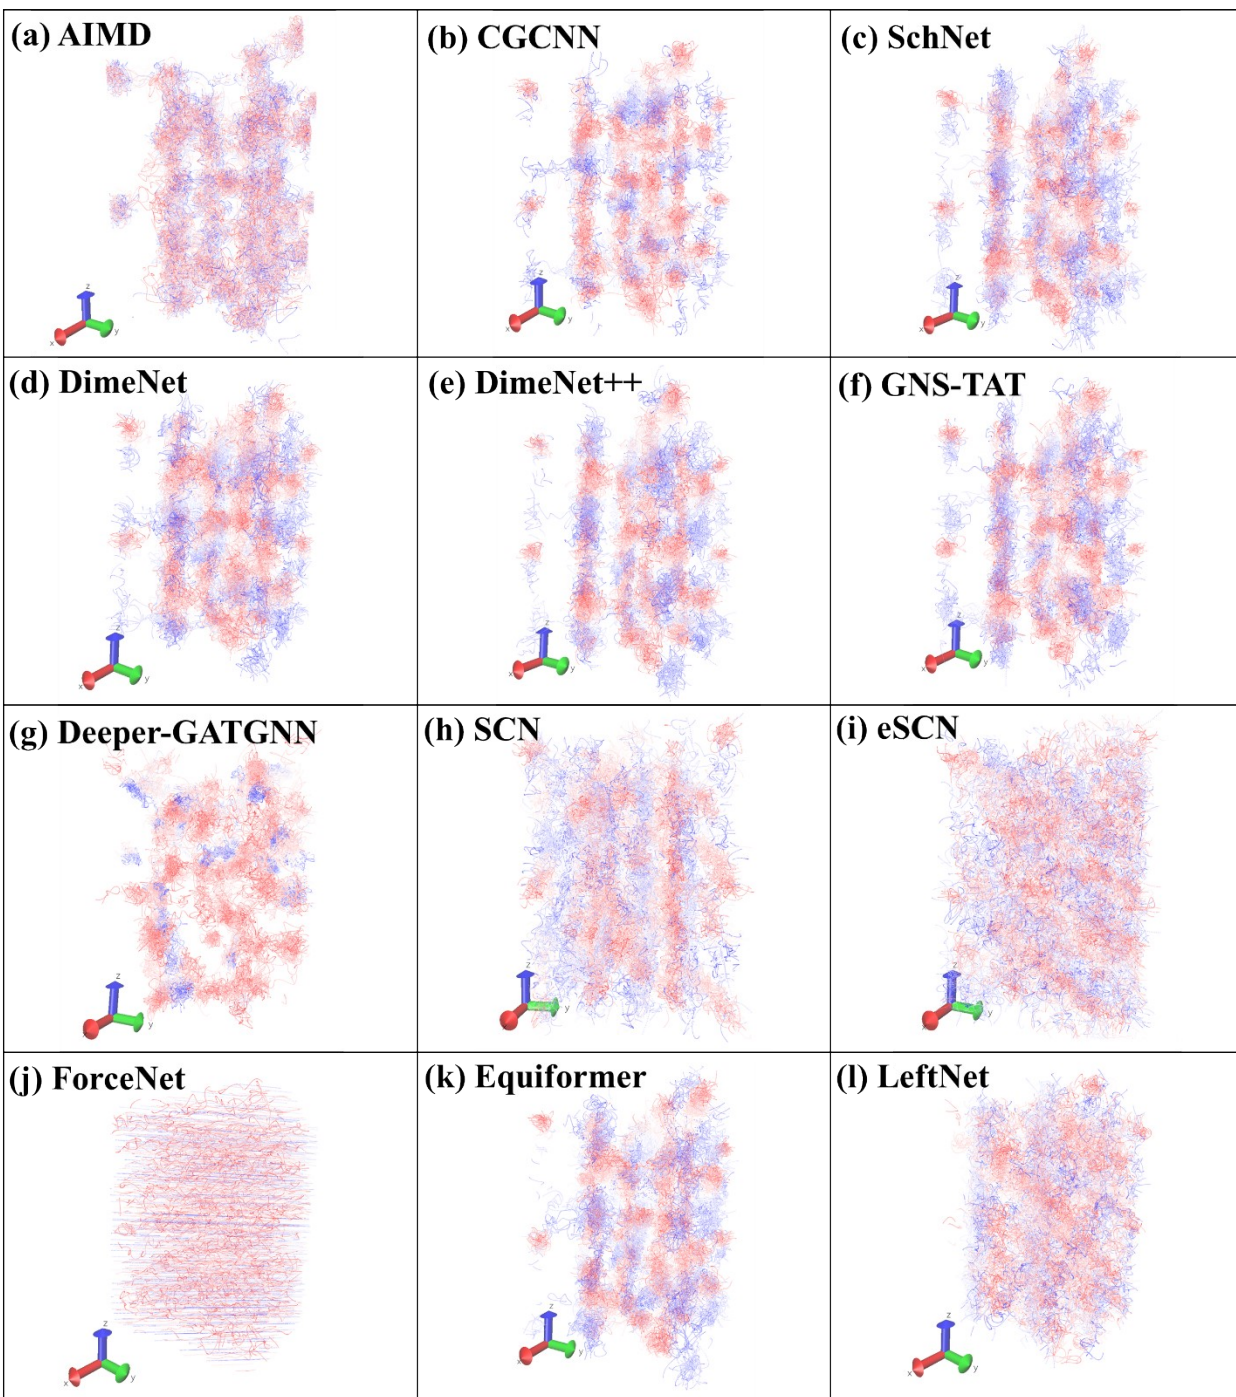

**Figure S23** Time evolution of MLFF-MD trajectories for Li Atoms within the simulation system of  $\text{Li}_{10}\text{GeP}_2\text{S}_{12}$  over 50 ps at 800K.

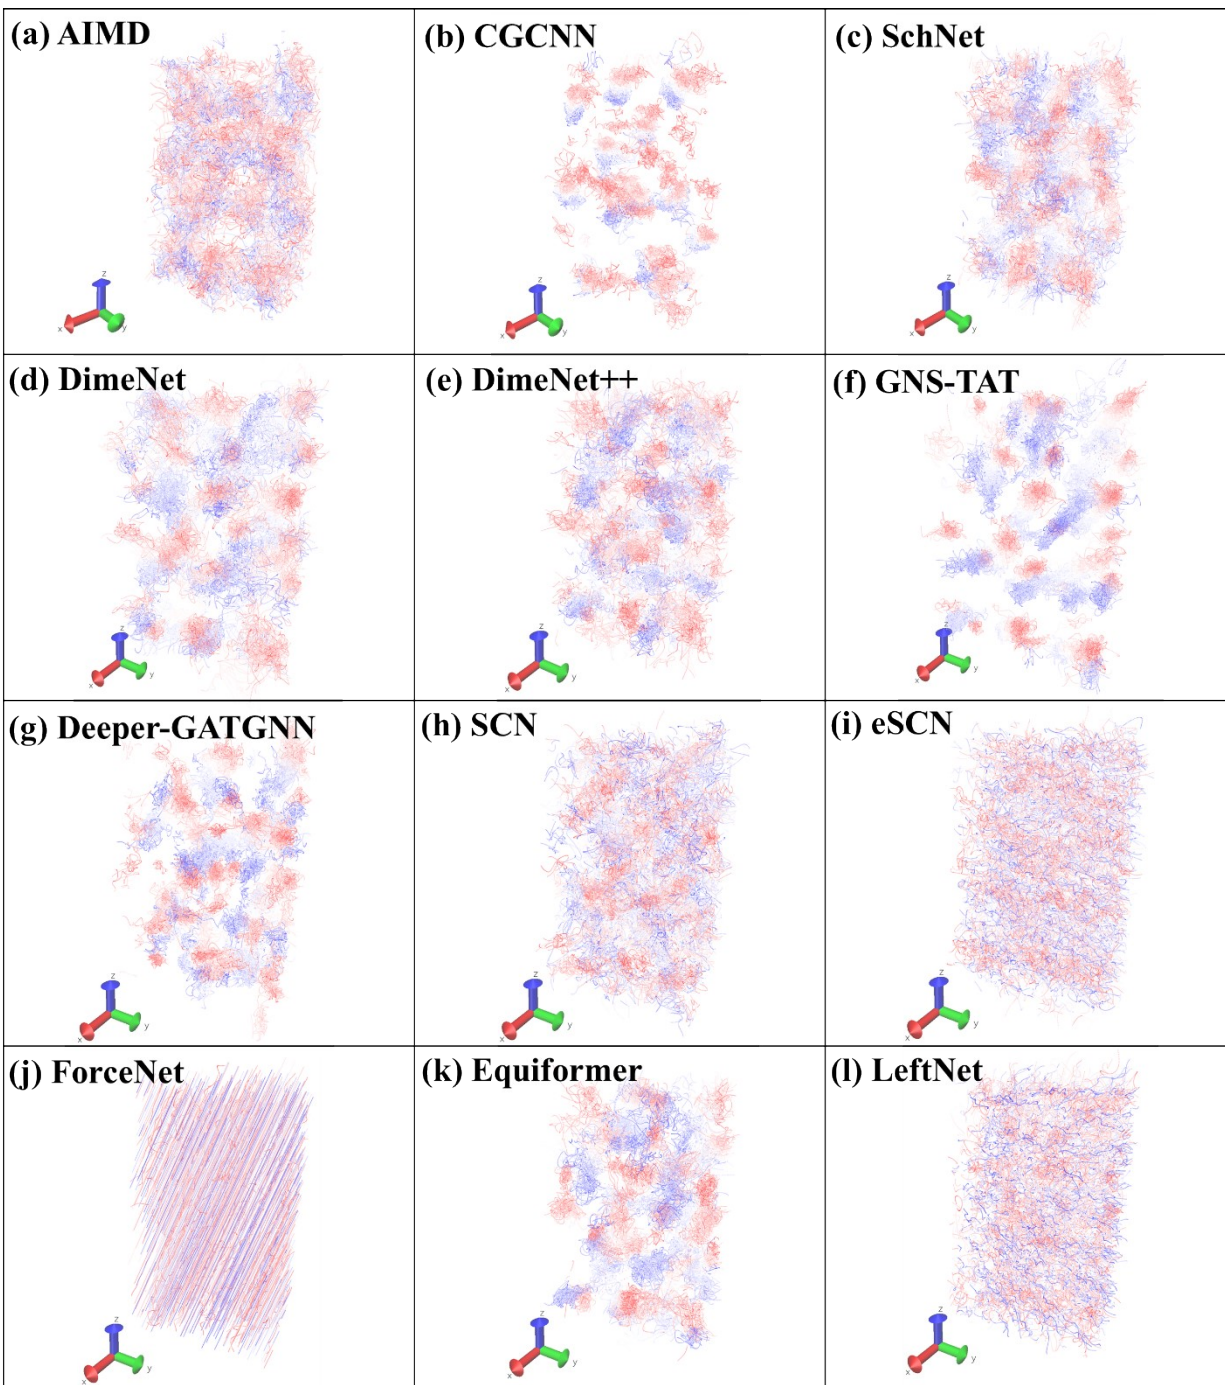

**Figure S24** Time evolution of MLFF-MD trajectories for Li Atoms within the simulation system of  $\text{Li}_3\text{PS}_4$  over 50 ps at 800K.

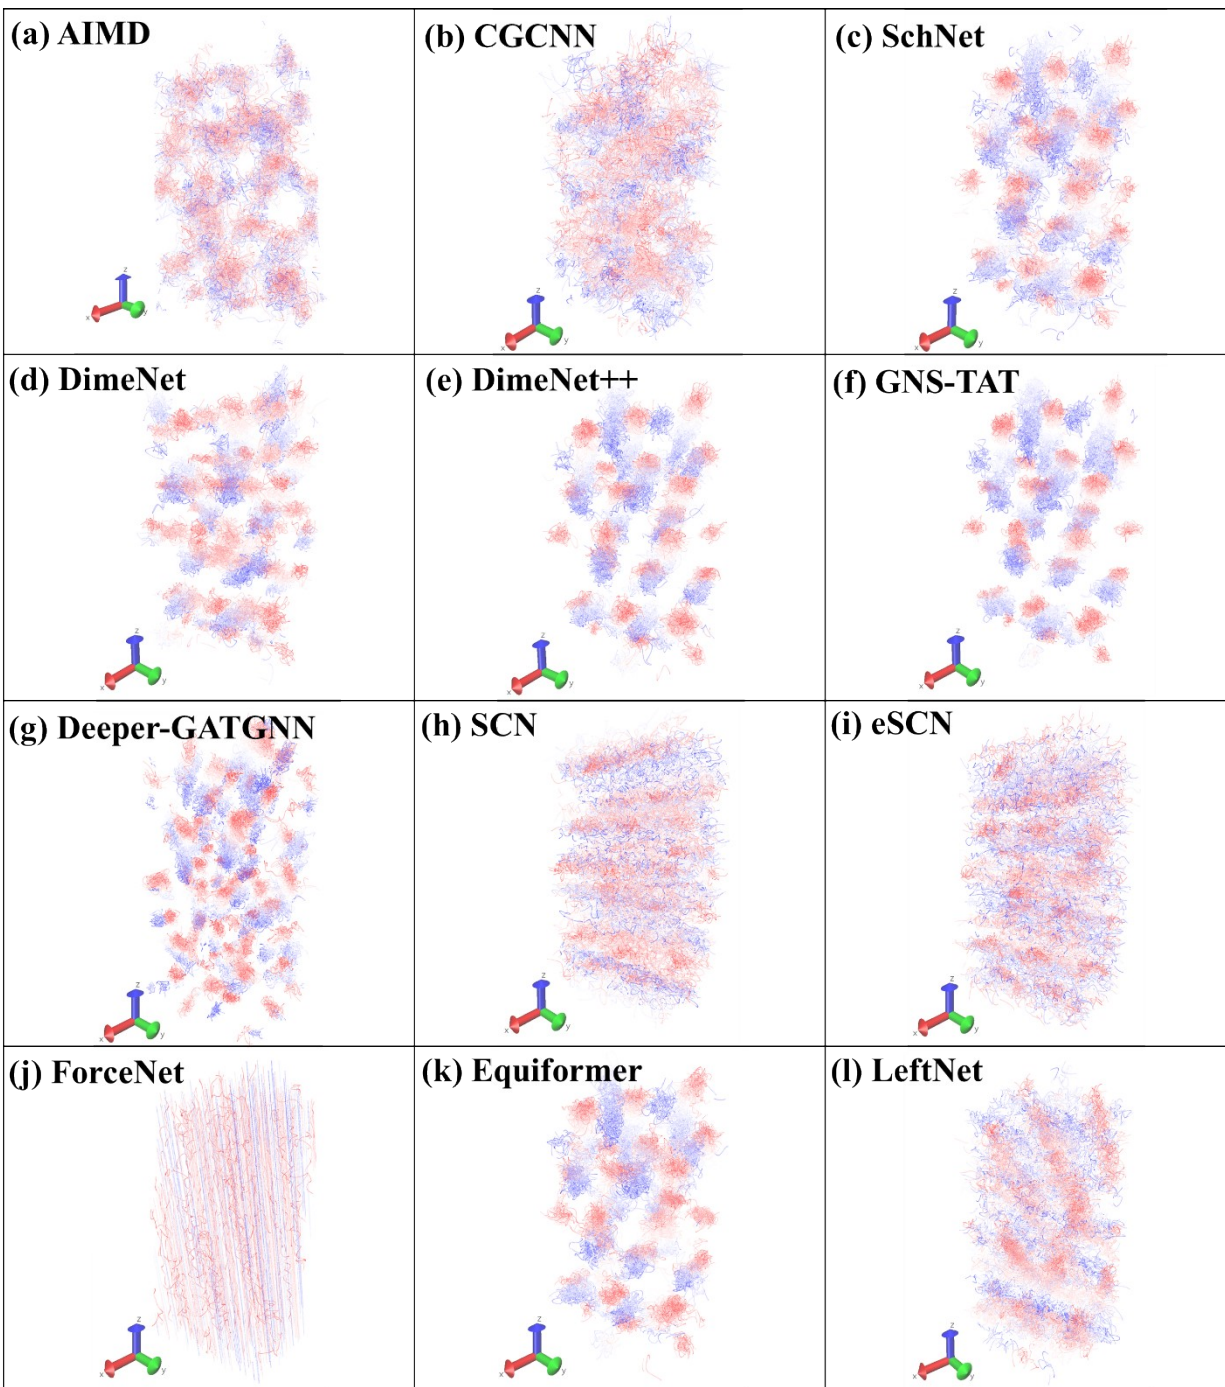

**Figure S25** Time evolution of MLFF-MD trajectories for Li Atoms within the simulation system of  $\text{Li}_4\text{GeS}_4$  over 50 ps at 800K.
